1 **Bacterial quorum sensing signal arrests phytoplankton cell division and protects against**  
2 **virus-induced mortality**

3 Scott B. Pollara<sup>a</sup>, Jamie W. Becker<sup>a</sup>, Brook L. Nunn<sup>b</sup>, Rene Boiteau<sup>c</sup>, Daniel Repeta<sup>d</sup>, Miranda C.  
4 Mudge<sup>b</sup>, Grayton Downing<sup>a</sup>, Davis Chase<sup>a</sup>, Elizabeth L. Harvey<sup>e\*</sup>, Kristen E. Whalen<sup>a\*</sup>

5  
6 <sup>a</sup>Department of Biology, Haverford College, Haverford, PA

7 <sup>b</sup>Department of Genome Sciences, University of Washington, Seattle, WA

8 <sup>c</sup>College of Earth, Ocean, and Atmospheric Sciences, Oregon State University, Corvallis, OR

9 <sup>d</sup>Marine Chemistry & Geochemistry, Woods Hole Oceanographic Institution, Woods Hole, MA

10 <sup>e</sup>Department of Biological Sciences, University of New Hampshire, Durham, NH

11 \*Corresponding authors: [kwhalen1@haverford.edu](mailto:kwhalen1@haverford.edu); [elizabeth.harvey@unh.edu](mailto:elizabeth.harvey@unh.edu)

12

13 **Keywords:** HHQ, cell cycle, DNA damage, PARP, viral-induced mortality

14 **Author Contributions.** G.D. and S.B.P performed dose-response experiments. E.L.H and D.C.

15 conducted the long-term growth assays. E.L.H. conducted the viral mortality assays. K.E.W. and

16 S.B.P. performed the diagnostic biochemical assays, TEM sample prep and analysis. S.B.P.

17 performed quantitative cell cycle analysis, TUNEL assays, and PARP inhibition assay. J.W.B.

18 isolated RNA and performed the transcriptomic analysis. S.B.P., B.L.N., M.C.M. performed

19 mass spectrometry for proteomics and data analysis. R.B. and D.R. conducted mass spectrometry

20 on GEOTRACES samples. K.E.W. quantified HHQ biosynthesis genes. K.E.W, S.B.P., E.L.H.,

21 J.W.B., B.L.N. analyzed data. S.B.P., K.E.W., and E.L.H. wrote the manuscript with

22 contributions from all co-authors.

23 **Competing Interest Statement:** The authors declare no competing interests.

24 This PDF file includes:

25 Main Text

26 Figures 1 to 6

27

28

29

30

31

32

33

34

35

36

37

38

39

40

41

42

43

44

45

46

47

48 **ABSTRACT**

49 Interactions between phytoplankton and heterotrophic bacteria fundamentally shape marine  
50 ecosystems. These interactions are driven by the exchange of compounds, however, linking these  
51 chemical signals, their mechanisms of action, and resultant ecological consequences remains a  
52 fundamental challenge. The bacterial signal 2-heptyl-4-quinolone (HHQ), induces immediate  
53 cellular stasis in the coccolithophore, *Emiliania huxleyi*, however, the mechanism responsible  
54 remains unknown. Here, we show that HHQ exposure leads to the accumulation of DNA damage  
55 in phytoplankton and prevents its repair. While this effect is reversible, HHQ-exposed  
56 phytoplankton are also protected from viral mortality, ascribing a new role of quorum sensing  
57 signals in regulating multi-trophic interactions. Further results demonstrate global HHQ  
58 production potential and the first *in situ* measurements of HHQ which coincide with areas of  
59 enhanced micro- and nanoplankton biomass. Our results support bacterial communication signals  
60 as emerging players, providing a new mechanistic framework for how compounds may  
61 contribute to structure complex marine microbial communities.

62

63 **INTRODUCTION**

64 Interactions between marine phytoplankton and bacteria have been shown to fundamentally  
65 shape marine ecosystems, particularly by mediating biogeochemical cycling, regulating  
66 productivity, and trophic structure<sup>1,2,3</sup>. Bacteria-phytoplankton interactions are complex, often  
67 being species-specific<sup>4</sup> or temporally ephemeral<sup>5</sup> and can span the spectrum from antagonistic  
68 to beneficial<sup>6,7</sup>. Increasingly, it is clear that these intricate inter-kingdom interactions are  
69 facilitated by excreted chemical compounds that mediate a suite of processes such as nutrient  
70 transfer, primary production, and shifts in community composition. Linking chemical compound

71 identity with a mechanism of action and ecological consequences will strengthen our  
72 understanding into how these fundamental and multifaceted interactions govern marine  
73 ecosystem function.

74 First discovered in marine systems four decades ago <sup>8</sup>, quorum sensing (QS) is a form of  
75 microbial cell-cell communication through which marine bacteria use diffusible chemical signals  
76 to facilitate coordinated and cooperative biogeochemically important behaviors <sup>9</sup>. Recent work  
77 finds alkylquinolone-based QS signals can modulate interspecies behavior, suggesting that these  
78 molecules may influence cellular communication at the interkingdom level <sup>10</sup>. In particular, the  
79 alkylquinolone QS signal 2-heptyl-4-quinolone (HHQ) functions as a messenger molecule, able  
80 to modulate bacterial virulence behavior, facilitating the emergence of the pathogen  
81 *Pseudomonas aeruginosa* within polymicrobial communities <sup>11,12</sup>. Additionally, HHQ has also  
82 been implicated in antagonizing fungal biofilm formation <sup>12</sup>, downregulating eukaryotic host  
83 immune response via suppression of a key transcription factor, NF- $\kappa$ B <sup>10</sup>, and activating  
84 receptors found to play a role in innate immune signaling in airway epithelia <sup>13</sup>. These findings  
85 support the influence of alkylquinolones in mediating host-microbe interactions. More recently,  
86 HHQ was isolated from marine gamma-proteobacteria (*Pseudomonas* sp. and  
87 *Pseudoalteromonas* sp.) where it was observed to cause significant shifts in both natural  
88 phytoplankton and microbial communities <sup>14</sup> and induce species-specific decreases in  
89 phytoplankton growth at nanomolar concentrations <sup>15</sup>. However, the underlying molecular  
90 mechanism(s) by which HHQ influences phytoplankton fitness remains unknown.

91 Here, ultrastructural observations and diagnostic biochemical assays were integrated with  
92 transcriptomic and proteomic studies to link the persistent but reversible physiological impact of  
93 nanomolar concentrations of HHQ on a model marine phytoplankton, *Emiliania huxleyi* <sup>15</sup> in

94 order to determine the molecular underpinnings of HHQ exposure. *E. huxleyi* plays a central role  
95 in mediating ocean carbon <sup>16</sup> and sulfur <sup>17</sup> cycling. Thus, the results presented here emphasize the  
96 importance of considering the ecological consequences of chemically-mediated bacteria-  
97 phytoplankton interactions for global primary production and biogeochemical cycles.

98

## 99 **RESULTS AND DISCUSSION**

100 To detail how HHQ impacts algal growth and morphology, batch cultures of axenic *E.*  
101 *huxleyi* (CCMP 2090) were exposed to 100 ng ml<sup>-1</sup> of HHQ, a concentration representing the  
102 center of a range of inhibitory concentrations (IC<sub>50</sub>) for this species (Fig. S1A <sup>15</sup>). Throughout the  
103 remainder of this study HHQ was dosed at a final concentration of 100 ng ml<sup>-1</sup> unless otherwise  
104 specified. Cells exposed to HHQ for 504 h (21 d) exhibited cellular stasis (no cell division nor  
105 mortality) concomitant with a significant increase (repeated analysis of variance (ANOVAR), *p*-  
106 value < 0.01 for all comparisons) in forward scatter, red fluorescence, and side scatter, proxies  
107 for cell size, chlorophyll content, and cell roughness, respectively (Fig. 1A-C, Fig. S2A).  
108 Photosynthetic efficiency (Fv/Fm) did not change in response to long-term HHQ exposure  
109 (ANOVAR, Fig. S2B). Morphological analysis found *E. huxleyi* cells exposed to HHQ for 24 h  
110 had enlarged chloroplasts with distended thylakoid membranes containing numerous intra-  
111 organelle vesicles, abundant cytoplasmic vesicles/vacuoles, homogenous nuclei staining lacking  
112 defined euchromatin/heterochromatin regions with disintegrated nuclear envelopes, and osmium-  
113 rich puncta within and adjacent to the chloroplasts likely indicating enhanced lipid storage (Fig.  
114 1D-E, Figs. S3, S4). After 14 d of HHQ exposure, cells contained numerous chloroplasts and  
115 mitochondria, enhanced cytoplasmic vacuolization, nucleoli with distinct fibrillar centers,  
116 abundant lipid droplets, and cultures contained expelled chloroplasts (Fig. 1F, Fig. S5). The

117 impact of HHQ on phytoplankton appears to be species-specific, as similar growth and  
118 morphology dynamics were not observed for phytoplankton species unaffected by HHQ (Fig.  
119 S6; <sup>15</sup>). Interestingly, when HHQ was diluted to ~80-fold below the IC<sub>50</sub> in cultures previously  
120 exposed to 100 ng ml<sup>-1</sup> of HHQ, growth rate, cell size, red fluorescence, and side scatter of *E.*  
121 *huxleyi* recovered to control conditions (ANOVAR, Fig. S7). After 504 h of HHQ exposure, the  
122 recovering cells took 144 h to exhibit growth dynamics that were not significantly different to  
123 the control, however, recovery did occur, indicating that the effects of HHQ are reversible  
124 (ANOVAR, Fig. S7). Recovery or ‘escape’ from growth detrimental conditions has been  
125 observed previously for *E. huxleyi* in response to viral infection <sup>18</sup>.

126 To identify eukaryotic pathways affected by HHQ, whole-cell transcriptomic and  
127 proteomic analyses were performed on *E. huxleyi* cells exposed to 1 ng ml<sup>-1</sup> (low), 10 ng ml<sup>-1</sup>  
128 (medium), and 100 ng ml<sup>-1</sup> (high) HHQ concentrations, with samples taken at 24 h (transcripts)  
129 and 72 h (transcripts and proteins). After 72 h of exposure, replicate high HHQ samples appeared  
130 distinct from the DMSO vehicle control samples (Figs. S8 – S10), with 37.6% of transcripts  
131 (Wald test, *q*-value < 0.05) and 15.9% of proteins (Welch’s approximate t-test, *q*-value < 0.05)  
132 significantly changing in relative abundance and abundance, respectively (Figs. S11 and S12,  
133 Table S1). When examined together, a total of 665 genes and corresponding proteins were found  
134 to be significantly changing in abundance at 72 h under high HHQ treatment relative to the  
135 vehicle control (Fig. 2). In general, processes associated with DNA replication and repair,  
136 aerobic respiration, and protein catabolism yielded higher relative transcript and protein  
137 abundances under high HHQ treatment, while photosynthetic components/processes were  
138 detected at lower relative transcript and protein abundances (Fig. 2).

139 **Cell cycle.** To investigate the mechanisms of the long-term, but reversible, cellular stasis  
140 observed in HHQ-exposed *E. huxleyi*, the impact of HHQ on cell cycle was examined. Using  
141 flow cytometry, cell cycle analysis indicated a cessation of the typical cell cycle progression of  
142 *E. huxleyi* within 10 h of HHQ exposure, as demonstrated by a gradual accumulation of cells in  
143 early S-phase over multiple days (Fig. 3, Fig. S13). The phenotypic response of HHQ treated *E.*  
144 *huxleyi* cells appears to mirror previous studies in which cellular arrest has been observed in  
145 phytoplankton in response to bacterially derived chemical exposure<sup>19, 20, 21, 22, 23</sup>, as well as  
146 nutrient limitation<sup>24, 25, 26</sup>. Indeed, at the physiological level, the response of *E. huxleyi* to HHQ  
147 parallels phosphorus (P) limitation in phytoplankton (i.e. S/G2 phase arrest, decreased growth  
148 rate, and increases in chlorophyll content, forward scatter, and side scatter)<sup>24, 25, 27</sup>. However, the  
149 canonical response in P-limited cells of upregulation of both alkaline phosphatase and  
150 phosphodiesterases<sup>28, 29, 30</sup> was not observed in cells exposed to HHQ. Nor do we see significant  
151 induction of acid phosphatases, pyrophosphatase, phosphorus transporters, or ATP-sulfurylase  
152 enzymes known to be induced following P-limitation in HHQ exposed cells, indicating the lack  
153 of phosphorus stress (Dataset S1). Therefore, while the pattern of cell cycle arrest is similar  
154 between HHQ-treated *E. huxleyi* and nutrient limitation, the underlying mechanisms are distinct.

155 In phytoplankton, cellular arrest is often accompanied by induction of autocatalytic or  
156 programmed cell death (PCD) responses such as increased reactive oxygen production or  
157 caspase-like activity<sup>31</sup>, and previous findings in mammalian cells indicate that HHQ has the  
158 ability to activate PCD pathways<sup>32</sup>. Using a series of diagnostic fluorescent assays (i.e.  
159 membrane permeabilization, caspase activity, reactive oxygen species (ROS), and nitrous oxide  
160 (NO) production) (Fig. S14) on HHQ exposed *E. huxleyi* cells, no evidence of PCD/apoptosis  
161 was discovered. Additionally, no transcripts or proteins associated with PCD increased in

162 abundance with exposure to HHQ (Dataset S1). The occurrence of cellular arrest in the absence  
163 of apoptosis indicates that HHQ exposed cells likely progress through the G1/S transition  
164 commitment point, but then stall and accumulate in S-phase (Fig. 3B, Fig. S13). This observation  
165 is supported by the increased relative abundance of canonical transcripts enabling the G1/S  
166 transition including cell division control protein 6 (CDC6), origin recognition complex subunit 1  
167 (ORC), and cyclins A, B, E, and K, in HHQ-exposed treatments (Fig. 4, Dataset S1). Moreover,  
168 significant increases in relative transcript abundances of DNA replication fork machinery (i.e.,  
169 DNA polymerases  $\alpha$ ,  $\epsilon$ , and  $\delta$ , DNA primase, replication protein A, topoisomerases (TOPO), the  
170 minichromosomal maintenance complex, proliferating cell nuclear antigen, and replication factor  
171 C, Fig. 4; Dataset S1) at 72 h post HHQ exposure, suggests an intent to replicate DNA, a  
172 hallmark of S-phase<sup>33</sup>. However, despite this observed induction of DNA replication machinery,  
173 cell cycle analysis demonstrated DNA synthesis was severely diminished following HHQ  
174 exposure (Fig. 3, Fig. S13), suggesting that HHQ interferes with the ability of *E. huxleyi* cells to  
175 correctly complete the DNA replication process. Disruption of DNA replication induces DNA  
176 damage response pathways thereby activating effector kinases such as Chk1 and Chk2 (Fig. 4)  
177 necessary for the halting of DNA synthesis and induction of cell cycle arrest to allow for time for  
178 repair<sup>34</sup>. Under HHQ treatment, Chk1 and Chk2 are differentially abundant, however, protein  
179 phosphorylation patterns need to be interrogated to understand how these DDR regulators are  
180 impacted by HHQ presence. Moreover, we observed a significant decrease in the relative  
181 abundance of histone transcripts and proteins (Fig. 4) following HHQ exposure, which is a  
182 hallmark of DNA synthesis disruption as DNA replication and histone production are coupled  
183 and the cell possesses pathways to remove histone transcripts following DNA replication stress  
184<sup>35</sup>.



185 **DNA replication and repair.** During S-phase, a cell must tightly regulate the availability of  
186 nucleotides to ensure faithful DNA replication<sup>36</sup>. Therefore S-phase cells rely on *de novo*  
187 nucleotide synthesis pathways to produce enough materials for complete genome replication<sup>37</sup>.  
188 Several transcripts and proteins involved in *de novo* purine (amidophosphoribosyltransferase,  
189 trifunctional purine biosynthetic protein adenosine-3 (GART), and  
190 phosphoribosylformylglycinamide synthase, bifunctional purine biosynthesis protein (ATIC),  
191 adenylosuccinate synthase, IMP dehydrogenase, and GMP synthase) and pyrimidine (carbamoyl  
192 phosphate synthase II, aspartatecarbamoyl transferase, and CTP synthases) nucleotide synthesis  
193 increased in abundance with HHQ exposure (Fig. 4, Dataset S1). Increased nucleotide synthesis  
194 may indicate the need to produce the necessary materials to replenish nucleotide pools during  
195 replication. However, we observe only partial replication of the *E. huxleyi* genome following  
196 HHQ exposure (Fig. 3, Fig. S13), suggesting nucleotide availability is limited and HHQ may  
197 disrupt the production of nucleotides.

198 Alkylquinolones are known to inhibit a key rate-limiting enzyme directly involved in  
199 bacterial pyrimidine synthesis, dihydroorotate dehydrogenase (DHODH)<sup>38</sup>. DHODH inhibition  
200 in eukaryotes may induce an intra-S-phase arrest due to severely diminished cellular nucleotide  
201 pools that can disrupt DNA replication, stall replication forks, and increase the frequency of  
202 genomic DNA lesions, including strand breaks, during S-phase<sup>39,40</sup>. Indeed, after 46 h of HHQ  
203 exposure, a significant increase in DNA strand breaks was observed in culture (Welch's  
204 approximate t-test,  $p = 0.032$ ; Fig. S15A), and not observed when HHQ was directly exposed to  
205 genomic *E. huxleyi* or Lambda DNA (Fig. S15B). This indicates that DNA strand breaks are not  
206 caused directly by HHQ, but indirectly through other mechanisms. It has been previously  
207 observed that following the induction of DNA damage during S-phase, cells will enter an intra-S

208 phase arrest that drastically slows the rate of DNA replication to allow the DNA damage  
209 response (DDR) to resolve any DNA lesions<sup>41</sup>. With the exception of preliminary work in  
210 *Chlamydomonas reinhardtii* and dinoflagellates, the DDR response has not been well  
211 characterized in phytoplankton<sup>42,43</sup>. Of the 57 mammalian DDR protein homologs in the *E.*  
212 *huxleyi* genome (e-value  $\leq 10^{-20}$ ), 41 were significantly differentially expressed, of which 37  
213 increased in relative abundance at 72 h under high HHQ exposure (Dataset S1), indicating the  
214 cell is attempting to repair DNA lesions. However, DNA damage induced by the inhibition of  
215 DHODH is known to activate apoptotic pathways through the hyperactivation of the DDR<sup>44</sup>. No  
216 apoptotic pathway activation was observed with HHQ exposure, suggesting the DDR response  
217 itself may also be impacted by HHQ.

218 A master regulator of the DDR involved in chromatin remodeling, nucleolar structure  
219 (thereby facilitating formation of telomerase and ribogenesis machinery), and genome stability is  
220 poly(ADP-ribose) polymerase (PARP) (Fig. 4)<sup>45</sup>. PARP binds to sites of DNA damage and stalls  
221 replication forks and produces negatively charged ADP-ribose polymers to serve as a scaffold  
222 for the necessary repair proteins to resolve the DNA lesion or restart the fork<sup>46</sup>. PARP homologs  
223 in *E. huxleyi* were found to increase in both relative transcript abundance and protein abundance  
224 under HHQ treatment (Dataset S1). Further, HHQ alteration of *E. huxleyi* nucleoli morphology  
225 (Figs. S4, S5) and the differential abundance of genes and proteins in PARP activity-dependent  
226 processes, including ribogenesis and telomerase biogenesis (Dataset S1;<sup>47,48</sup>), was observed.  
227 Interestingly, the genomes of phytoplankton species unaffected by HHQ<sup>15</sup> did not reveal the  
228 presence of any PARP homologs, further implicating PARPs in the response of phytoplankton to  
229 HHQ.

230 Under high levels of DNA damage or if repair mechanisms are compromised, PARP can  
231 become overactivated and deplete cellular  $\text{NAD}^+$  and ATP pools, thereby inducing apoptotic  
232 pathways<sup>49</sup>. As no apoptotic activity was observed in these experiments, HHQ may inhibit  
233 PARP activity. Inhibition of PARP activity in the presence of DNA damage drastically reduces  
234 the effectiveness of the DDR response and is known to induce cellular arrest in the S-phase<sup>50</sup>.  
235 HHQ was found to significantly inhibit human PARP activity (Welch's approximate t-test,  $p =$   
236 0.0002; Fig. S15C), while a closely related alkylquinolone, 2-heptyl-3-hydroxy-4(1H)-quinolone  
237 (PQS), did not possess PARP inhibitory activity, nor did it impact *E. huxleyi* growth (Figs. S1B  
238 and S15B). Together, the observation of prolonged S-phase arrest, the upregulation of the DDR  
239 response in HHQ-exposed cultures, the conserved nature of the mammalian and *E. huxleyi* PARP  
240 catalytic site (Fig. S16), and the chemical structural similarities of HHQ to known inhibitors of  
241 both PARP and DHODH with core benzimidazole moieties<sup>51</sup>, collectively suggest that HHQ  
242 may function simultaneously to inhibit both PARP and DHODH activity in *E. huxleyi*.  
243 Additional experiments using *E. huxleyi* enzymes are needed to fully characterize whether PARP  
244 and DHODH are molecular targets of HHQ.

245 **Energy Production.** In order to facilitate DNA synthesis and repair, the cell requires large ATP  
246 pools<sup>52</sup>, and there were several lines of evidence to support ATP generation in HHQ exposed  
247 cells. First, an increased relative transcript abundance of enzymes in the tricarboxylic acid (TCA)  
248 cycle (i.e., isocitrate dehydrogenase,  $\alpha$ -ketoglutarate dehydrogenase, succinate dehydrogenase,  
249 fumarase, and malate dehydrogenase) (Fig. 4, Dataset S1) was observed in HHQ exposed cells,  
250 indicating the potential overproduction of reducing equivalents for ATP production via oxidative  
251 phosphorylation. Second, HHQ exposure had a profound effect on ATP/ADP transport, as  
252 transcripts for an ATP/ADP translocase, which catalyzes the highly specific transport of ATP

253 across membranes in exchange for ADP, increased in relative abundance (Dataset S1). Third, an  
254 increase in the relative transcript abundance of sirtuin-like deacetylases, metabolic efficiency  
255 controllers<sup>53</sup>, were observed following HHQ exposure (Fig. 4, Dataset S1). Sirtuins compete  
256 with PARPs to use NAD<sup>+</sup> and expression of these deacetylases is dependent on NAD<sup>+</sup>  
257 availability<sup>54</sup>. PARP inhibition is known to drastically increase cellular NAD<sup>+</sup> pools, thereby  
258 promoting sirtuin expression and activity<sup>55</sup>. Increased sirtuin activity in HHQ exposed cells may  
259 also explain the increase in the relative transcript abundance of manganese superoxide dismutase  
260 (Mn-SOD) (Fig. 4), an antioxidant enzyme that protects the cell from ROS induced damage<sup>56</sup>.  
261 Finally, increased relative transcript abundance of the tryptophan-mediated *de novo* NAD<sup>+</sup>  
262 synthesis pathway was also observed, potentially in an attempt to increase NAD<sup>+</sup> availability  
263 (Fig. 4, Dataset S1). Taken together, these results suggest that HHQ exposure promotes  
264 increased energy production in *E. huxleyi*, which may enable the cell to fuel various biosynthesis  
265 and repair pathways while staving off the induction of PCD.

266 **Aspartate metabolism.** In HHQ exposed cells, an increase in relative transcript abundance was  
267 observed for multiple pathways leading to the production of aspartate (i.e., TCA cycle, the  
268 aspartate-arginosuccinate shunt, glutamic oxaloacetic transaminase (GOT), and C4-like  
269 photosynthesis; Fig. 4, Dataset S1). In parallel, a decrease in the relative abundance of transcripts  
270 for aspartate utilization pathways, with the exception of nucleotide synthesis pathways, was  
271 observed (Fig. 4, Dataset S1). Aspartate is known to rescue cells from S-phase arrest by fueling  
272 *de novo* nucleotide synthesis<sup>57</sup>. Another way the cell can recover amino acids, including  
273 aspartate, is through the degradation of proteins via proteasomal pathways<sup>58</sup>, which increased on  
274 both the transcript and protein level following HHQ treatment (Fig. 2). While the increased  
275 cellular demand for ATP would necessitate the upregulation of glycolytic enzymes like

276 hexokinase, the first step in glycolysis, there was a significant decrease in the relative transcript  
277 abundance of hexokinase (Fig. 4). These findings are consistent with previous work  
278 demonstrating alkylquinolones suppress induction of this glycolytic enzyme through the direct  
279 targeting of the transcription factor hypoxia-inducible factor 1 (HIF-1) protein degradation via  
280 proteasomal pathways<sup>59</sup>. Furthermore, in order to conserve amino acid resources, a shift to the  
281 Entner-Doudoroff glycolytic pathway in HHQ treated cells (Fig. 4, Dataset S1) was observed.  
282 The Entner-Doudoroff glycolytic pathway has a lower protein demand in comparison to other  
283 glycolytic pathways<sup>60</sup>. These results suggest that *E. huxleyi* may be shunting resources from  
284 various pools towards the production of aspartate to alleviate the effects of HHQ induced S-  
285 phase arrest. However, further investigations measuring the availability of aspartate and  
286 aspartate-derived metabolites in HHQ exposed cells is required to understand what is being  
287 produced following this shift in *E. huxleyi* metabolism.

288 **Photosynthesis and redox.** HHQ-induced cell cycle arrest in *E. huxleyi* did not significantly  
289 alter photosynthetic energy conversion efficiency, however, the majority of light-harvesting  
290 complexes and transcripts of the Calvin cycle decreased in relative abundance under HHQ  
291 exposure (Figs. 2 and 4). These findings parallel those described for the diatom *Phaeodactylum*  
292 *tricornutum* undergoing chemically-mediated cell cycle arrest<sup>61</sup>. In plants, the coordinated  
293 down-regulation of transcripts involved in photosynthesis, electron transport (i.e. photosystem I  
294 and II, ATP synthase, and light-harvesting complexes), and the Calvin cycle is thought to allow  
295 for the reallocation of resources towards defense against bacterial and viral pathogens<sup>62</sup>.  
296 However, a decrease in transcript abundance does not always correlate with a loss of function.  
297 Photosynthetic proteins have a long functional half-life in the cell with the exception of  
298 ferredoxin (Fd) and ferredoxin NADP<sup>+</sup> oxidoreductase (FNR)<sup>62</sup>. Following pathogen infection,

299 cellular redox state can be altered eliciting an increase in both transcript abundance and protein  
300 expression of ferredoxin and FNR<sup>62</sup>. The maintenance of cellular redox pools for metabolism  
301 and antioxidant defense requires an influx of electrons via light-based reactions and NADPH-  
302 powered redox cascades. In photoautotrophs, all reducing power derived from photosynthetic  
303 electron transport passes through ferredoxin acting as an electron distribution hub able to provide  
304 feedback on the redox state of the chloroplast<sup>63</sup>. Together, both ferredoxin and the isofunctional  
305 flavodoxin (Fld) participate in electron shuttling between cellular sources of reducing power and  
306 electron-consuming routes, preventing electron misrouting that can lead to ROS accumulation  
307 and restoring chloroplast redox homeostasis under environmental stress<sup>64</sup>. Indeed, the genes and  
308 proteins with the most significant differential expression levels under HHQ exposure in *E.*  
309 *huxleyi* were Fd (58-fold increase in transcript and 3-fold increase in protein), FNR (85-fold  
310 increase in transcript), and Fld (38-fold increase in transcript and 186-fold increase in protein)  
311 (Fig. 2 & 4, Dataset S1), which may explain the observed lack of ROS production (Fig. S14C-E).  
312 Additional reduction systems including FAD/NAD(P) oxidoreductases, ferredoxin nitrite  
313 reductase (Fd-NR), and glutathione reductase (GR) in HHQ treated *E. huxleyi* were also  
314 significantly induced which could ameliorate NADPH build-up (Fig. 4). Moreover, HHQ  
315 exposure resulted in an increased relative expression of vitamin B6 (VitB6) transcripts, which  
316 has been shown to protect against oxidative stress in chloroplasts (Fig. 4)<sup>65</sup>. In addition, under  
317 HHQ treatment transcripts for proline oxidase (POX) and pyrroline-5-carboxylate reductase  
318 (P5CR) increased in relative abundance (Fig. 4). POX is involved in protection against metabolic  
319 stress, and is closely linked with the TCA cycle by donating electrons to the electron transport  
320 chain to support ATP generation. Furthermore, both POX and P5CR contribute to the cycling of  
321 proline between the cytosol and mitochondria eventually leading to ATP generation and NAD<sup>+</sup>

322 production to maintain redox homeostasis<sup>66</sup> or to be used by other enzymes, possibly PARP.  
323 Together, these results suggest that HHQ exposed *E. huxleyi* uniformly decreased the relative  
324 abundance of photosynthetic gene transcripts in support of a coordinated induction of defense  
325 responses aimed at maintaining cellular redox homeostasis without debilitating photosynthetic  
326 capacity.

327 **Auxin Production.** The small signaling molecule indole-3-acetic acid (IAA) is an abundant  
328 plant hormone known to control plant and algal growth and cell division<sup>67</sup>. Homologs of the  
329 genes involved in several tryptophan-dependent IAA biosynthesis pathways were found to  
330 increase in relative abundance under HHQ treatment (Fig. 4). Previous studies have indicated  
331 only those coccolith-bearing *E. huxleyi* strains were capable of producing IAA, however, naked  
332 strains, like those used in this study, were more susceptible to IAA effects including increasing  
333 cell size and impaired membrane integrity<sup>67</sup>. Interestingly, IAA at concentrations up to 25  $\mu\text{g}$   
334  $\text{ml}^{-1}$  significantly stimulated biofilm formation in the HHQ-producing bacteria, *Pseudomonas*  
335 *aeruginosa* (PAO1) and suppressed growth of planktonic bacterial cells<sup>68</sup>. Additional work is  
336 necessary to investigate if IAA produced by *E. huxleyi* acts as a bacterial attractant, thereby  
337 invoking similar biofilm behaviors in associated *Pseudoaltermonas* strains.

338 **Ecological Consequences.** Given that viral replication requires hijacking of host-replication  
339 machinery and HHQ exposure inhibited DNA replication in *E. huxleyi*, the impact of HHQ on  
340 host-virus dynamics was investigated. When *E. huxleyi* cells were exposed to HHQ and *E.*  
341 *huxleyi* virus (EhV) strain 207, virus-induced cellular death was significantly reduced  
342 (ANOVAR,  $p$ -value < 0.0001; Fig. 5). Visual inspection of electron microscopy images showed  
343 enhanced lipid content and cytoplasmic vacuoles/vesicles following HHQ treatment (Fig. 1E-F,  
344 Figs. S4, S5) in parallel with transcriptional induction of cellular components that mediate

345 endocytosis (i.e., alpha-adaptin, dynamin), vacuolar/vesicle trafficking (i.e., vesicle protein  
346 sorting; VPS45, vacuolar sorting protein 46A, coatamer protein, ADP ribosylation factor),  
347 membrane traffic (i.e., Rab GTPase), and cytoskeletal components/modifiers (i.e., tubulin,  
348 cofilin) including motors (i.e., kinesin) (Dataset S1). This suggests that HHQ may impact the  
349 entry and delivery of eukaryotic viral DNA to a host cell. Viral infection will significantly alter  
350 the metabolism of the infected cell and influence the production of metabolites, altering the  
351 landscape of metabolites available for uptake<sup>69</sup>. Protection against viral mortality, would  
352 theoretically permit increased survival of phytoplankton and allow for bacteria to continue to  
353 take advantage of coordinated nutrient exchange, common between bacteria and phytoplankton  
354<sup>70</sup>. To better understand these ecological consequences, additional work is needed to clarify  
355 whether HHQ-induced protection against viral mortality is due to a decrease in infection, a  
356 cessation of viral replication, or the inability of the viral particles to lyse the cell.

357 **Broader significance and conclusions.** Finally, the distribution of HHQ in surface waters and  
358 prevalence of HHQ biosynthetic machinery was examined to understand the potential ecosystem  
359 level impact of this bacterial QS molecule. Using the TARA Ocean Gene Atlas web service, the  
360 signatures of eight genes involved in alkylquinolone synthesis were found to be globally  
361 distributed - extending from surface waters to the deep chlorophyll maximum layer (Fig. S17),  
362 indicating the potential for HHQ synthesis is ubiquitous. Additionally, LC-ESI-MS chemical  
363 analysis found  $> 1 \text{ ng L}^{-1}$  surface concentrations of HHQ in the eastern tropical South Pacific,  
364 while concentrations were below the limit of detection ( $< 0.18 \text{ ng L}^{-1}$ ) in open ocean oligotrophic  
365 waters (Fig. 6; Fig. S18). Although these measured bulk concentrations were well below the  $\text{IC}_{50}$   
366 for coccolithophores, they likely do not represent the effective concentration a marine microbial  
367 cell would experience in the phycosphere<sup>71</sup>. Evidence from the biomedical literature indicates



368 alkylquinolones, including HHQ, can be concentrated to micromolar levels within membrane  
369 vesicles and directly released by bacteria<sup>72</sup>. For marine bacteria closely associated with  
370 phytoplankton, these membrane vesicles could directly expose phytoplankton cells to  
371 concentrations of HHQ well beyond the experimental concentrations used here. While  
372 environmental genomic data and bulk chemical analysis provide important insights into the  
373 ubiquity of potential phytoplankton-bacterial interactions, quantifying bacterial metabolites in  
374 the phycosphere microenvironment remains a critical challenge to understanding the role of  
375 secondary metabolites in phytoplankton-bacterial interactions<sup>71</sup>.

376         These findings demonstrate that a quorum sensing signal produced by a marine bacterium  
377 significantly, but reversibly, leads to DNA lesions in a eukaryotic phytoplankter, thereby  
378 arresting the cell cycle, reprogramming intermediate metabolism, and restructuring cellular  
379 architecture therefore significantly influencing inter-kingdom interactions in the sea. As a  
380 consequence, these chemically-induced changes are demonstrated to have a cascading impact on  
381 a major vector of phytoplankton death, viral mortality. Given the ubiquity of HHQ synthesis  
382 genes and relative abundance of HHQ in the marine environment coinciding with enhanced  
383 phytoplankton biomass, our results suggest that alkylquinolone signaling plays a significant role  
384 in structuring complex microbial communities and, ultimately, influencing primary production  
385 and biogeochemical cycles. In addition, our findings highlight the functional duality of bacterial  
386 cues that serve both as diffusive messengers used as a communication tool in microbial  
387 communities, but also as chemical mediators of eukaryotic physiology capable of impacting  
388 trophic level dynamics in marine ecosystems.

389

## 390 **MATERIALS AND METHODS**

## 391 **General Cultivation Conditions**

392 Three species of phytoplankton were used in this study, axenic *Emiliana huxleyi*  
393 (CCMP2090), *Phaeodactylum tricornutum* (CCMP2561), and *Dunaliella tertiolecta*  
394 (CCMP1320); all from the National Center for Marine Algae and Microbiota, East Boothbay,  
395 Maine) were grown in natural seawater-based f/2 medium both with (*P. tricornutum*) and  
396 without (*E. huxleyi* and *D. tertiolecta*) silica<sup>73</sup>. Cultures were maintained on a 14:10 h light ( $80 \pm$   
397  $5 \mu\text{mol photons m}^{-2} \text{s}^{-1}$ ):dark cycle at 17 °C, and salinity of 35. These conditions will be referred  
398 to hereafter as general culturing conditions. Strain purity was confirmed using f/2 MM and f/2  
399 MB purity test broths (Table S2) and visually confirmed by epifluorescence microscopy<sup>74</sup>.  
400 Cultures were transferred weekly to maintain exponentially growing cultures.

401 Phytoplankton cells were enumerated by hemocytometer or using a flow cytometer  
402 (Guava, Millipore). Via the flow cytometer, cell abundance was determined by using species-  
403 specific settings including their forward scatter, side scatter, and red fluorescence (695/50 nm)  
404 emission characteristics. All samples were run at  $0.24 \mu\text{l s}^{-1}$  for 3 min, either live or fixed with  
405 glutaraldehyde (0.5% final concentration). A correction factor was applied to fixed cell  
406 abundances to account for cell loss due to preservation.

407

## 408 **Growth Experiments**

409 The HHQ concentration resulting in 50% growth inhibition (IC<sub>50</sub>) was determined using  
410 triplicate 2 - 20 ml cultures of *E. huxleyi* ( $\sim 100,000 \text{ cells ml}^{-1}$ ) exposed to HHQ (between 0.25 –  
411  $512 \text{ ng ml}^{-1}$ ), PQS ( $0.5 - 530 \mu\text{g ml}^{-1}$ ), or vehicle control (0.1% DMSO) for 72 h. Growth rates  
412 were calculated using an exponential growth equation and were plotted against HHQ  
413 concentration to determine IC<sub>50</sub> at 72 h post exposure as described previously<sup>15</sup>.

414 To examine the long-term impacts of HHQ, triplicate flasks of 30 ml cultures of *E.*  
415 *huxleyi* (~ 50,000 cells ml<sup>-1</sup>) were exposed to either 1 or 100 ng ml<sup>-1</sup> HHQ, or a vehicle (0.1%  
416 DMSO) control. The experiment was sampled daily for 21 days to monitor *E. huxleyi* abundance,  
417 forward scatter, side scatter, red fluorescence, and photosynthetic efficiency (Fv/Fm). Fv/Fm was  
418 measured using a Fluorescence Induction and Relaxation (FIRe) system (Satlantic). Samples  
419 were dark adapted for 30 min, and photosystem II kinetics were measured from the average of 10  
420 iterations of an 80 µs single turnover event and 1000 ms of weak modulated light.

421 To measure recovery, after 24, 48, 72, 96 h, or 21 d of HHQ exposure, triplicate 2 ml  
422 aliquots of HHQ-exposed culture was transferred into 198 ml of fresh media, effectively diluting  
423 HHQ to 1 ng ml<sup>-1</sup>. The same dilution was made with the vehicle control treatment, and the  
424 experiment was sampled daily for *E. huxleyi* growth rate, forward scatter, side scatter, and red  
425 fluorescence.

426 To investigate viral infection dynamics, triplicate 50 ml cultures were prepared for the  
427 following treatments: *E. huxleyi* (~ 40,000 cells ml<sup>-1</sup>) + vehicle control (0.1% DMSO), *E. huxleyi*  
428 + EhV 207 (3.2 x 10<sup>6</sup> EhV ml<sup>-1</sup>), *E. huxleyi* + HHQ (100 ng ml<sup>-1</sup>), *E. huxleyi* + HHQ + EhV 207.  
429 Samples were taken daily to monitor *E. huxleyi* abundance.

430 For all growth experiments, excluding the IC<sub>50</sub> calculation, significant differences  
431 between treatments were determined by comparing abundances over time using ANOVAR,  
432 followed by a Dunnett's multiple comparisons test<sup>75</sup>. All data was tested to ensure that it passed  
433 the assumptions for normality and sphericity prior to running the ANOVAR.

434

## 435 **Physiological Assays**

436 Propidium iodide (PI) was used to quantitatively discriminate cell cycle stage in HHQ-  
437 exposed phytoplankton cultures over 122 h. Three replicate 2 L cultures were dosed with either  
438 100 ng ml<sup>-1</sup> HHQ or vehicle control (0.002% DMSO). Fixed cells were enumerated every 24 h  
439 via flow cytometry. Every 2 h, approximately 10<sup>6</sup> cells were subsampled, pelleted, and washed  
440 twice via centrifugation at 3,214 x g for 15 minutes at 18 °C. The dry cell pellets were  
441 resuspended in 1 ml of ice-cold LCMS-grade methanol, transferred to microcentrifuge tubes and  
442 stored at -80 °C. To read, methanol-fixed cells were centrifuged at 16,000 x g for 10 minutes at 4  
443 °C, methanol removed, and pellets were resuspended in 1 ml of 1X DPBS before re-pelleting by  
444 centrifugation at 16,000 x g for 10 minutes at 4 °C. The pellet was resuspended in 0.5 ml of  
445 FxCycle PI/RNase solution (Thermo Fisher) and incubated for 30 minutes in the dark and then  
446 measured via flow cytometry (583/26 nm emission).

447 Diagnostic fluorescent dye assays were used to measure indicators of cell stress and  
448 programmed cell death (PCD) following HHQ treatment. Intercellular reactive oxygen species  
449 (ROS), nitric oxide (NO) production, mitotoxicity, cytotoxicity, and quantification of caspase  
450 proteases and activity were measured in *E. huxleyi* (CCMP2090) following HHQ treatment (70  
451 ng ml<sup>-1</sup> or 100 ng ml<sup>-1</sup>) at various time points up to 72 h post-exposure. See SI Appendix,  
452 Supplementary Information Text for detailed protocols.

453 *E. huxleyi* DNA integrity was examined using a modified protocol for the Click-iT  
454 TUNEL Alexa Fluor 488 Imaging Assay kit (Thermo Fisher). Cells were assayed using the  
455 manufacturer protocol and were sampled after 46 h HHQ exposure, with tagged cells enumerated  
456 via flow cytometry (512/18 nm emission). See SI Appendix Supplementary Information text for  
457 detailed protocols.

458

## 459 **Transmission Electron Microscopy**

460 Replicate 20 ml cultures of exponentially growing *E. huxleyi* ( $\sim 1 \times 10^5$  cells ml<sup>-1</sup>) were  
461 exposed to either 100 ng ml<sup>-1</sup> HHQ or vehicle control (0.2% DMSO) for 24 and 337 h (14 d).  
462 Samples were concentrated by filtration on a 0.45  $\mu$ m polycarbonate filter and transitioned out of  
463 f/2 media via three sequential washes with 10 ml of 0.2 M sodium cacodylate buffer pH 7.4, then  
464 fixed in 2% glutaraldehyde in 0.2 M sodium cacodylate buffer, pH 7.4. Samples were post-fixed  
465 in 2.0% osmium tetroxide for 1 h at room temperature and rinsed in DH<sub>2</sub>O prior to *en bloc*  
466 staining with 2% uranyl acetate. After dehydration through a graded ethanol series, the cells were  
467 infiltrated and embedded in Embed-812 (Electron Microscopy Sciences). Thin sections were  
468 stained with uranyl acetate and lead citrate and examined with a JEOL 1010 electron microscope  
469 fitted with at Hamamatsu digital camera and AMT Advantage NanoSprint500 software.

470

## 471 **Transcriptomic and Proteomic Analysis**

472 A large-scale culturing experiment was performed with axenic *E. huxleyi* (CCMP2090)  
473 treated with either three concentrations of HHQ (1 ng ml<sup>-1</sup>, 10 ng ml<sup>-1</sup>, 100 ng ml<sup>-1</sup>) or vehicle  
474 control (0.002% DMSO) for 72 h. Following HHQ/DMSO exposure, 400 ml subsamples were  
475 taken from each quadruplicate 2 L bottle at both 24 and 72 h for total RNA isolation and an  
476 additional 1200 ml subsample was taken at 72 h for total protein isolation. Total RNA and  
477 protein were isolated and quantified as described in SI Appendix, Supplementary Information  
478 Text.

479 For RNA-seq analysis, the KAPA Stranded mRNA-Seq library preparation kit (Kapa  
480 Biosystems) was used to prepare library samples and sequenced on the NextSeq platform  
481 (Illumina) to generate 75 bp paired-end reads. Low-quality reads and adaptor sequences were

482 trimmed using Trimmomatic (V0.38; <sup>76</sup>). Transcript abundances were determined using *Salmon*  
483 (V0.12.0; <sup>77</sup>) and the Ensembl <sup>78</sup> gene predictions for *E. huxleyi* CCMP1516 (the non-axenic  
484 form of CCMP2090; [ftp://ftp.ensemblgenomes.org/pub/protists/release-](ftp://ftp.ensemblgenomes.org/pub/protists/release-41/fasta/emiliana_huxleyi/cdna/)  
485 [41/fasta/emiliana\\_huxleyi/cdna/](ftp://ftp.ensemblgenomes.org/pub/protists/release-41/fasta/emiliana_huxleyi/cdna/)) as a transcript target index (k-mer size = 23). Normalization  
486 and determination of significantly differentially abundant transcripts was performed using the  
487 DESeq2 R package (V1.22.1; <sup>79</sup>). Tests for differential expression were carried out with the  
488 Wald test using a negative binomial generalized linear model. Logarithmic fold change (LFC)  
489 estimates were shrunken using the apegglm package (V1.6.0; <sup>80</sup>) within DESeq2. Resulting *p*  
490 values were adjusted using the Benjamini-Hochberg (BH) procedure (see SI Appendix,  
491 Supplementary Information Text).

492 For proteomic analysis, proteins were solubilized in urea, reduced, alkylated, and trypsin  
493 digested following <sup>81</sup>. Resulting peptides samples were desalted with a mini-centrifugal C18  
494 column following manufacturer's instructions (Nest Group). Peptides were chromatographically  
495 separated (precolumn: 3 cm, 100  $\mu$ m i.d.; analytical column: 30 cm x 75  $\mu$ m i.d; resin: 3  $\mu$ m  
496 C18-AQ) with a nanoAcquity UPLC System (2–35% ACN, 0.1% v/v formic acid; 250 nl min<sup>-1</sup>,  
497 90 minute) directly inline with a Fusion Lumos Orbitrap Tribrid mass spectrometer (Thermo  
498 Fisher Scientific) operated in data independent acquisition mode (DIA) following methods in <sup>82</sup>.  
499 To generate a peptide spectral library, 1  $\mu$ g of a pooled sample containing equal parts from each  
500 peptide digest was analyzed with six gas phase fractions covering 400-1000 m/z in 100 m/z  
501 increments (4 m/z staggered MS2 windows, 2m/z overlap). Each bioreplicate was then  
502 quantified in single DIA analyses (MS1: 400-1000 m/z; 8 m/z staggered MS2 windows, 4m/z  
503 overlap).

504 In order to generate absolute abundance measurements of detected proteins, raw MS data  
505 files were processed using msconvert (ProteoWizard) for demultiplexing and peak picking.  
506 EncyclopeDIA (V0.7.4) was used to 1) search resulting fragmentation spectra against the  
507 UniProt *E. huxleyi* CCMP1516 protein and contaminant database (10.0 ppm precursor, fragment,  
508 and library tolerances), 2) provide peptide-level area under the curve (AUC) data, and 3)  
509 generate quantitative reports of identified peptides and proteins for each HHQ MS experiment  
510 (1% false discovery rate). Significant changes ( $p < 0.05$ ) in protein abundances between HHQ  
511 treatment and vehicle control were calculated as log<sub>2</sub> fold-change between treatments. Complete  
512 details of protein sample preparations, chromatographic separations, mass spectrometry detection  
513 and quantification can be found in SI Appendix, Supplementary Information Text.

514

### 515 **PARP Inhibition and Homology Modelling**

516 To examine the impact of alkylquinolone exposure on mammalian PARP activity, an  
517 inhibition assay was performed using the PARP Universal Colorimetric Assay Kit (R&D  
518 systems) according to the manufacturer instructions. Human PARP enzyme (0.5 U) was exposed  
519 to 50  $\mu$ M HHQ, 50  $\mu$ M PQS, or vehicle control (0.25% DMSO) for 15 min prior to the addition  
520 of a PARP activity buffer. See SI Appendix Supplementary Information text for a detailed  
521 protocol.

522 The *E. huxleyi* sequence XP\_005783504.1 was aligned to the Protein Data Bank (PDB)  
523 database to determine the closest structural homolog with a small molecular inhibitor veliparib in  
524 the active site that could lend insight into HHQ binding.

525

### 526 **Exploring the Biogeography of HHQ Biosynthesis Genes**

527 A conserved gene locus encoding genes involved in alkylquinolone biosynthetic pathway  
528 were previously identified from *Pseudoalteromonas piscicida* (A757)<sup>15</sup> and used to search the  
529 Ocean Gene Atlas web-based platform to explore the biogeography of genes with homology to  
530 pqsABCDE operon responsible for HHQ synthesis. Protein sequences from *P. piscicida* (A757)  
531 (Genbank Accession numbers: KT879191–KT879199) were searched against the Ocean  
532 Microbial Reference Gene Catalog (OM-RGC, version 1) using BLASTp search tools with an  
533 initial customized e-value threshold of  $1 \times 10^{-10}$ .

534

### 535 **Detection of HHQ in Environmental Samples**

536 Seawater samples were collected along a cruise track from Manta, Ecuador to Tahiti from  
537 October to December 2013 (US GEOTRACES EPZT GP16) as described previously<sup>83</sup>. Briefly,  
538 seawater was collected at 3m depth by a tow-fish and pumped at a flow rate of  $250 \text{ ml min}^{-1}$   
539 through a  $0.2 \mu\text{m}$  filter and a polytetrafluoroethylene column packed with 20 g of polystyrene  
540 resin (Bondesil ENV; Agilent). Each sample represents an integrated average of 400-600 L of  
541 water across a wide region. Samples were frozen onboard at  $-20 \text{ }^\circ\text{C}$ . Prior to analysis, thawed  
542 columns were rinsed with 500 ml of  $18.2 \text{ M}\Omega \text{ cm}$  ultra-high purity water (qH<sub>2</sub>O) and eluted with  
543 250 ml of LCMS grade methanol. The extracts were concentrated by rotary evaporation and  
544 brought up in a final volume of 6 ml of qH<sub>2</sub>O that was stored at  $-20^\circ\text{C}$ . The organic extracts were  
545 separated by high pressure liquid chromatography (Dionex Ultimate 3000) coupled to an  
546 Orbitrap Fusion MS (Thermo Scientific), with specific methodology found in the SI Appendix,  
547 Supplementary Information Text.

548

### 549 **Acknowledgements**



550 We acknowledge the support from the Electron Microscopy Resource Laboratory at the  
551 University of Pennsylvania for TEM sample processing. We thank Vinayak Agarwal for  
552 homology modeling support and discussions, Kay Bidle for viral culture, Bradley Moore for  
553 tetrabromopyrrole, and Katie Barott for flow cytometry support. We thank members of the  
554 Whalen Laboratory including Ellysia Overton, Yongjie Gao, Carlotta Pazzi, Megan Coolahan,  
555 Shreya Kishore, Lucy Zhao for assistance in phytoplankton sampling for RNA and protein  
556 isolation and constructive discussions. We thank the Georgia Genomics and Bioinformatics Core  
557 facility for RNA sequencing. Funding for this work was supported by the NSF grant (OCE-  
558 1657808) awarded to K.E.W. and E.L.H. K.E.W. was also supported by a Faculty Research  
559 Grant from Haverford College as well as funding from the Koshland Integrated Natural Science  
560 Center and Green Fund at Haverford College. E.L.H. was also supported by a Sloan Foundation  
561 Research Fellowship. B.L.N was supported by NSF grant (OCE-1633939). M.C.M. was  
562 supported by a NIH training grant (T32 HG000035). Mass spectrometry was partially supported  
563 by the University of Washington Proteomics Resource (UWPR95794). D.R. was supported by  
564 funding through the Gordon and Betty Moore Foundation (Grant 6000), the Simons  
565 Collaboration for Ocean Processes and Ecology Grant (329108), and an NSF grant (OCE-  
566 1736280). R.B. was supported by an NSF Graduate Research Fellowship and an NSF grant  
567 (OCE-1829761).

568

### 569 **Data Deposition Statement**

570 Sequences from this study have been deposited in the Gene Expression Omnibus and are  
571 accessible through GEO Series accession number GSE131846  
572 (<https://www.ncbi.nlm.nih.gov/geo/query/acc.cgi?acc=GSE131846>). The raw mass spectrometry

573 proteomics data and subsequent spectral libraries have been deposited to the ProteomeXchange  
574 Consortium via the PRIDE partner repository  
575 (<https://www.ebi.ac.uk/pride/archive/projects/PXD011560>).

576 **REFERENCES**

- 577 1. Azam F, Malfatti F. Microbial structuring of marine ecosystems. *Nat Rev Microbiol* **5**,  
578 782-791 (2007).
- 579 2. Buchan A, LeCleir GR, Gulvik CA, Gonzalez JM. Master recyclers: features and  
580 functions of bacteria associated with phytoplankton blooms. *Nature Reviews*  
581 *Microbiology* **12**, 686-698 (2014).
- 582 3. Cole JJ. Interactions between Bacteria and Algae in Aquatic Ecosystems. *Annu Rev Ecol*  
583 *Syst* **13**, 291-314 (1982).
- 584 4. Fukami K, Nishimura S, Ogusa M, Asada M, Nishijima T. Continuous culture with deep  
585 seawater of a benthic food diatom *Nitzschia* sp. *Hydrobiologia* **358**, 245-249 (1997).
- 586 5. Danger M, Oumarou C, Benest D, Lacroix G. Bacteria can control stoichiometry and  
587 nutrient limitation of phytoplankton. *Funct Ecol* **21**, 202-210 (2007).
- 588 6. Azam F, Fenchel T, Field JG, Gray JS, Meyerreil LA, Thingstad F. The Ecological Role  
589 of Water-Column Microbes in the Sea. *Mar Ecol Prog Ser* **10**, 257-263 (1983).
- 590 7. Mayali X, Azam F. Algicidal bacteria in the sea and their impact on algal blooms.  
591 *Journal of Eukaryotic Microbiology* **51**, 139-144 (2004).
- 592 8. Nealson KH, Platt T, Hastings JW. Cellular control of the synthesis and activity of the  
593 bacterial luminescent system. *J Bacteriol* **104**, 313-322 (1970).
- 594 9. Hmelo LR. Quorum Sensing in Marine Microbial Environments. *Ann Rev Mar Sci* **9**,  
595 257-281 (2017).

- 596 10. Reen FJ, McGlacken GP, O'Gara F. The expanding horizon of alkyl quinolone signalling  
597 and communication in polycellular interactomes. *FEMS Microbiol Lett* **365**, (2018).
- 598 11. Deziel E, *et al.* Analysis of *Pseudomonas aeruginosa* 4-hydroxy-2-alkylquinolines  
599 (HAQs) reveals a role for 4-hydroxy-2-heptylquinoline in cell-to-cell communication.  
600 *Proc Natl Acad Sci U S A* **101**, 1339-1344 (2004).
- 601 12. Reen FJ, *et al.* The *Pseudomonas* quinolone signal (PQS), and its precursor HHQ,  
602 modulate interspecies and interkingdom behaviour. *Fems Microbiol Ecol* **77**, 413-428  
603 (2011).
- 604 13. Freund JR, *et al.* Activation of airway epithelial bitter taste receptors by *Pseudomonas*  
605 *aeruginosa* quinolones modulates calcium, cyclic-AMP, and nitric oxide signaling. *J Biol*  
606 *Chem* **293**, 9824-9840 (2018).
- 607 14. Whalen KE, Becker JW, Schrecengost AM, Gao YJ, Giannetti N, Harvey EL. Bacterial  
608 alkylquinolone signaling contributes to structuring microbial communities in the ocean.  
609 *Microbiome* **7**, (2019).
- 610 15. Harvey EL, *et al.* A Bacterial Quorum-Sensing Precursor Induces Mortality in the Marine  
611 Coccolithophore, *Emiliana huxleyi*. *Front Microbiol* **7**, (2016).
- 612 16. Balch WM, Holligan PM, Kilpatrick KA. Calcification, Photosynthesis and Growth of  
613 the Bloom-Forming Coccolithophore, *Emiliana-Huxleyi*. *Cont Shelf Res* **12**, 1353-1374  
614 (1992).
- 615 17. Simo R. Production of atmospheric sulfur by oceanic plankton: biogeochemical,  
616 ecological and evolutionary links. *Trends Ecol Evol* **16**, 287-294 (2001).

- 617 18. Frada MJ, Rosenwasser S, Ben-Dor S, Shemi A, Sabanay H, Vardi A. Morphological  
618 switch to a resistant subpopulation in response to viral infection in the bloom-forming  
619 coccolithophore *Emiliana huxleyi*. *PLoS Pathog* **13**, e1006775 (2017).
- 620 19. Pokrzywinski KL, Tilney CL, Warner ME, Coyne KJ. Cell cycle arrest and biochemical  
621 changes accompanying cell death in harmful dinoflagellates following exposure to  
622 bacterial algicide IRI-160AA. *Sci Rep* **7**, 45102 (2017).
- 623 20. van Tol HM, Amin SA, Armbrust EV. Ubiquitous marine bacterium inhibits diatom cell  
624 division. *ISME J* **11**, 31-42 (2017).
- 625 21. Barak-Gavish N, *et al.* Bacterial virulence against an oceanic bloom-forming  
626 phytoplankter is mediated by algal DMSP. *Sci Adv* **4**, eaau5716 (2018).
- 627 22. Bramucci AR, Case RJ. *Phaeobacter inhibens* induces apoptosis-like programmed cell  
628 death in calcifying *Emiliana huxleyi*. *Sci Rep* **9**, 5215 (2019).
- 629 23. Segev E, *et al.* Dynamic metabolic exchange governs a marine algal-bacterial interaction.  
630 *Elife* **5**, (2016).
- 631 24. Parpais J, Marie D, Partensky F, Morin P, Vaulot D. Effect of phosphorus starvation on  
632 the cell cycle of the photosynthetic prokaryote *Prochlorococcus* spp. *Mar Ecol Prog Ser*  
633 **132**, 265-274 (1996).
- 634 25. Rokitta S, Von Dassow P, Rost B, John U. P- and N-depletion trigger similar cellular  
635 responses to promote senescence in eukaryotic phytoplankton. *Frontiers in Marine*  
636 *Science* **3**, 109 (2016).

- 637 26. Vaulot D, Olson RJ, Merkel S, Chisholm SW. Cell-Cycle Response to Nutrient  
638 Starvation in 2 Phytoplankton Species, *Thalassiosira-Weissflogii* and *Hymenomonas-*  
639 *Carterae*. *Mar Biol* **95**, 625-630 (1987).
- 640 27. McKew BA, Metodieva G, Raines CA, Metodiev MV, Geider RJ. Acclimation of  
641 *Emiliana huxleyi* (1516) to nutrient limitation involves precise modification of the  
642 proteome to scavenge alternative sources of N and P. *Environ Microbiol* **17**, 4050-4062  
643 (2015).
- 644 28. Dyhrman ST. Nutrients and their acquisition: Phosphorus physiology in microalgae. In:  
645 *The Physiology of Microalgae. Developments in Applied Phycology* (eds Borowitzka M,  
646 Beardall J, Raven J). Springer, Cham (2016).
- 647 29. Dyhrman ST, Ruttenberg KC. Presence and regulation of alkaline phosphatase activity in  
648 eukaryotic phytoplankton from the coastal ocean: Implications for dissolved organic  
649 phosphorus remineralization. *Limnol Oceanogr* **51**, 1381-1390 (2006).
- 650 30. Xu Y, Wahlund TM, Feng L, Shaked Y, Morel FMM. A novel alkaline phosphatase in  
651 the coccolithophore *Emiliana huxleyi* (Prymnesiophyceae) and its regulation by  
652 phosphorus. *Journal of Phycology* **42**, 835-844 (2006).
- 653 31. Bidle KD. The molecular ecophysiology of programmed cell death in marine  
654 phytoplankton. *Ann Rev Mar Sci* **7**, 341-375 (2015).
- 655 32. Holban AM, Bleotu C, Chifiriuc MC, Bezirtzoglou E, Lazar V. Role of *Pseudomonas*  
656 *aeruginosa* quorum sensing (QS) molecules on the viability and cytokine profile of  
657 human mesenchymal stem cells. *Virulence* **5**, 303-310 (2014).

- 658 33. Limas JC, Cook JG. Preparation for DNA replication: the key to a successful S phase.  
659 *FEBS Lett* **593**, 2853-2867 (2019).
- 660 34. Ciardo D, Goldar A, Marheineke K. On the Interplay of the DNA Replication Program  
661 and the Intra-S Phase Checkpoint Pathway. *Genes (Basel)* **10**, (2019).
- 662 35. Christopher A, Hameister H, Corrigan H, Ebenhoh O, Muller B, Ullner E. Modelling  
663 Robust Feedback Control Mechanisms That Ensure Reliable Coordination of Histone  
664 Gene Expression with DNA Replication. *Plos One* **11**, e0165848 (2016).
- 665 36. Pai CC, Kearsley SE. A Critical Balance: dNTPs and the Maintenance of Genome  
666 Stability. *Genes (Basel)* **8**, (2017).
- 667 37. Lane AN, Fan TW. Regulation of mammalian nucleotide metabolism and biosynthesis.  
668 *Nucleic Acids Res* **43**, 2466-2485 (2015).
- 669 38. Wu Y, Seyedsayamdost MR. Synergy and Target Promiscuity Drive Structural  
670 Divergence in Bacterial Alkylquinolone Biosynthesis. *Cell Chem Biol* **24**, 1437-1444  
671 e1433 (2017).
- 672 39. Arnould S, *et al.* Checkpoint kinase 1 inhibition sensitises transformed cells to  
673 dihydroorotate dehydrogenase inhibition. *Oncotarget* **8**, 95206-95222 (2017).
- 674 40. Fairus AKM, Choudhary B, Hosahalli S, Kavitha N, Shatrah O. Dihydroorotate  
675 dehydrogenase (DHODH) inhibitors affect ATP depletion, endogenous ROS and mediate  
676 S-phase arrest in breast cancer cells. *Biochimie* **135**, 154-163 (2017).
- 677 41. Chao HX, *et al.* Orchestration of DNA Damage Checkpoint Dynamics across the Human  
678 Cell Cycle. *Cell Syst* **5**, 445-459 e445 (2017).

- 679 42. Li C, Wong JTY. DNA Damage Response Pathways in Dinoflagellates. *Microorganisms*  
680 7, (2019).
- 681 43. Vlcek D, Sevcovicova A, Sviezena B, Galova E, Miadokova E. Chlamydomonas  
682 reinhardtii: a convenient model system for the study of DNA repair in photoautotrophic  
683 eukaryotes. *Curr Genet* **53**, 1-22 (2008).
- 684 44. Liu LC, *et al.* Inactivation/deficiency of DHODH induces cell cycle arrest and programmed  
685 cell death in melanoma. *Oncotarget* **8**, 112354-112370 (2017).
- 686 45. Jagtap P, Szabo C. Poly(ADP-ribose) polymerase and the therapeutic effects of its  
687 inhibitors. *Nat Rev Drug Discov* **4**, 421-440 (2005).
- 688 46. Wei HT, Yu XC. Functions of PARylation in DNA Damage Repair Pathways. *Genom*  
689 *Proteom Bioinf* **14**, 131-139 (2016).
- 690 47. Boamah EK, Kotova E, Garabedian M, Jarnik M, Tulin AV. Poly(ADP-Ribose)  
691 Polymerase 1 (PARP-1) Regulates Ribosomal Biogenesis in Drosophila Nucleoli. *Plos*  
692 *Genet* **8**, (2012).
- 693 48. di Fagagna FD, Hande MP, Tong WM, Lansdorp PM, Wang ZQ, Jackson SP. Functions  
694 of poly(ADP-ribose) polymerase in controlling telomere length and chromosomal  
695 stability. *Nature Genetics* **23**, 76-80 (1999).
- 696 49. Yu SW, *et al.* Mediation of poly(ADP-ribose) polymerase-1-dependent cell death by  
697 apoptosis-inducing factor. *Science* **297**, 259-263 (2002).
- 698 50. Noel G, Godon C, Fernet M, Giocanti N, Megnin-Chanet F, Favaudon V.  
699 Radiosensitization by the poly(ADP=ribose) polymerase inhibitor 4-amino-1,8-



- 700 naphthalimide is specific of the S phase of the cell cycle and involves arrest of DNA  
701 syntheses. *Mol Cancer Ther* **5**, 564-574 (2006).
- 702 51. Abdullah I, *et al.* Benzimidazole derivatives as potential dual inhibitors for PARP-1 and  
703 DHODH. *Bioorgan Med Chem* **23**, 4669-4680 (2015).
- 704 52. Milanese C, *et al.* DNA damage and transcription stress cause ATP-mediated redesign of  
705 metabolism and potentiation of anti-oxidant buffering. *Nat Commun* **10**, (2019).
- 706 53. Chang HC, Guarente L. SIRT1 and other sirtuins in metabolism. *Trends Endocrinol*  
707 *Metab* **25**, 138-145 (2014).
- 708 54. Canto C, Menzies KJ, Auwerx J. NAD(+) Metabolism and the Control of Energy  
709 Homeostasis: A Balancing Act between Mitochondria and the Nucleus. *Cell Metab* **22**,  
710 31-53 (2015).
- 711 55. Bai P, *et al.* PARP-1 inhibition increases mitochondrial metabolism through SIRT1  
712 activation. *Cell Metab* **13**, 461-468 (2011).
- 713 56. Webster BR, Lu Z, Sack MN, Scott I. The role of sirtuins in modulating redox stressors.  
714 *Free Radic Biol Med* **52**, 281-290 (2012).
- 715 57. Patel D, *et al.* Aspartate Rescues S-phase Arrest Caused by Suppression of Glutamine  
716 Utilization in KRas-driven Cancer Cells. *J Biol Chem* **291**, 9322-9329 (2016).
- 717 58. Suraweera A, Munch C, Hanssum A, Bertolotti A. Failure of amino acid homeostasis  
718 causes cell death following proteasome inhibition. *Mol Cell* **48**, 242-253 (2012).

- 719 59. Legendre C, Reen FJ, Mooij MJ, McGlacken GP, Adams C, O'Gara F. *Pseudomonas*  
720 *aeruginosa* Alkyl quinolones repress hypoxia-inducible factor 1 (HIF-1) signaling  
721 through HIF-1alpha degradation. *Infect Immun* **80**, 3985-3992 (2012).
- 722 60. Flamholz A, Noor E, Bar-Even A, Liebermeister W, Milo R. Glycolytic strategy as a  
723 tradeoff between energy yield and protein cost. *Proc Natl Acad Sci U S A* **110**, 10039-  
724 10044 (2013).
- 725 61. Kim J, *et al.* Effect of cell cycle arrest on intermediate metabolism in the marine diatom  
726 *Phaeodactylum tricornutum*. *Proc Natl Acad Sci U S A* **114**, E8007-E8016 (2017).
- 727 62. Bilgin DD, Zavala JA, Zhu J, Clough SJ, Ort DR, DeLucia EH. Biotic stress globally  
728 downregulates photosynthesis genes. *Plant Cell Environ* **33**, 1597-1613 (2010).
- 729 63. Scheibe R, Dietz KJ. Reduction-oxidation network for flexible adjustment of cellular  
730 metabolism in photoautotrophic cells. *Plant Cell Environ* **35**, 202-216 (2012).
- 731 64. Lodeyro AF, Ceccoli RD, Pierella Karlusich JJ, Carrillo N. The importance of flavodoxin  
732 for environmental stress tolerance in photosynthetic microorganisms and transgenic  
733 plants. Mechanism, evolution and biotechnological potential. *FEBS Lett* **586**, 2917-2924  
734 (2012).
- 735 65. Havaux M, *et al.* Vitamin B6 deficient plants display increased sensitivity to high light  
736 and photo-oxidative stress. *BMC Plant Biol* **9**, 130 (2009).
- 737 66. Liu W, Phang JM. Proline dehydrogenase (oxidase) in cancer. *Biofactors* **38**, 398-406  
738 (2012).

- 739 67. Labeeuw L, *et al.* Indole-3-Acetic Acid Is Produced by *Emiliana huxleyi* Coccolith-  
740 Bearing Cells and Triggers a Physiological Response in Bald Cells. *Front Microbiol* **7**,  
741 828 (2016).
- 742 68. Plyuta VA, Lipasova VA, Kuznetsov AE, Khmel IA. Effect of Salicylic, Indole-3-Acetic,  
743 Gibberellic, and Abscisic Acids on Biofilm Formation by *Agrobacterium tumefaciens*  
744 C58 and *Pseudomonas aeruginosa* PAO1. *Appl Biochem Micro+* **49**, 706-710 (2013).
- 745 69. Rosenwasser S, Ziv C, Creveld SGV, Vardi A. Virocell Metabolism: Metabolic  
746 Innovations During Host-Virus Interactions in the Ocean. *Trends Microbiol* **24**, 821-832  
747 (2016).
- 748 70. Cooper MB, Smith AG. Exploring mutualistic interactions between microalgae and  
749 bacteria in the omics age. *Curr Opin Plant Biol* **26**, 147-153 (2015).
- 750 71. Seymour JR, Amin SA, Raina JB, Stocker R. Zooming in on the phycosphere: the  
751 ecological interface for phytoplankton-bacteria relationships. *Nat Microbiol* **2**, 17065  
752 (2017).
- 753 72. Mashburn LM, Whiteley M. Membrane vesicles traffic signals and facilitate group  
754 activities in a prokaryote. *Nature* **437**, 422-425 (2005).
- 755 73. Guillard RRL. Culture of phytoplankton for feeding marine invertebrates. In: *Culture of*  
756 *marine invertebrate animals* (eds Smith WL, Chaney MH). Plenum Press (1975).
- 757 74. Becker JW, Brandon ML, Rappe MS. Cultivating microorganisms from dilute aquatic  
758 environments: melding traditional methodology with new cultivation techniques and

- 759 molecular methods. In: *Manual of Environmental Microbiology* (ed al. CJHe). 3rd edn.  
760 ASM Press (2007).
- 761 75. Dunnett CW. A Multiple Comparison Procedure for Comparing Several Treatments with  
762 a Control. *J Am Stat Assoc* **50**, 1096-1121 (1955).
- 763 76. Bolger AM, Lohse M, Usadel B. Trimmomatic: a flexible trimmer for Illumina sequence  
764 data. *Bioinformatics* **30**, 2114-2120 (2014).
- 765 77. Patro R, Duggal G, Love MI, Irizarry RA, Kingsford C. Salmon provides fast and bias-  
766 aware quantification of transcript expression. *Nat Methods* **14**, 417-419 (2017).
- 767 78. Kersey PJ, *et al.* Ensembl Genomes 2018: an integrated omics infrastructure for non-  
768 vertebrate species. *Nucleic Acids Res* **46**, D802-D808 (2018).
- 769 79. Love MI, Huber W, Anders S. Moderated estimation of fold change and dispersion for  
770 RNA-seq data with DESeq2. *Genome Biology* **15**, (2014).
- 771 80. Zhu A, Ibrahim JG, Love MI. Heavy-tailed prior distributions for sequence count data:  
772 removing the noise and preserving large differences. *Bioinformatics* **11**, R106 (2018).
- 773 81. Nunn BL, Slattery KV, Cameron KA, Timmins-Schiffman E, Junge K. Proteomics of  
774 *Colwellia psychrerythraea* at subzero temperatures - a life with limited movement,  
775 flexible membranes and vital DNA repair. *Environ Microbiol* **17**, 2319-2335 (2015).
- 776 82. Searle BC, *et al.* Chromatogram libraries improve peptide detection and quantification by  
777 data independent acquisition mass spectrometry. *Nat Commun* **9**, 5128 (2018).
- 778 83. Boiteau RM, *et al.* Siderophore-based microbial adaptations to iron scarcity across the  
779 eastern Pacific Ocean. *Proc Natl Acad Sci U S A* **113**, 14237-14242 (2016).

780 **FIGURES**

781 **Figure 1.** Physiological effects of HHQ on *E. huxleyi*. *E. huxleyi* cultures (N = 3) were exposed  
782 to HHQ or vehicle control (DMSO) and monitored by flow cytometry for cell abundance (a),  
783 forward scatter (b), and red fluorescence (c). Mean  $\pm$  standard deviation shown. Significant  
784 differences between HHQ-exposed cells and the vehicle control were evaluated using a repeated  
785 measures analysis of variance (ANOVAR;  $p < 0.05$ ). Transmission electron microscopy  
786 micrographs of *E. huxleyi* cells exposed to vehicle control (DMSO) (d) or 100 ng ml<sup>-1</sup> HHQ for  
787 24 h (e), or 100 ng ml<sup>-1</sup> HHQ for 14 d (f).

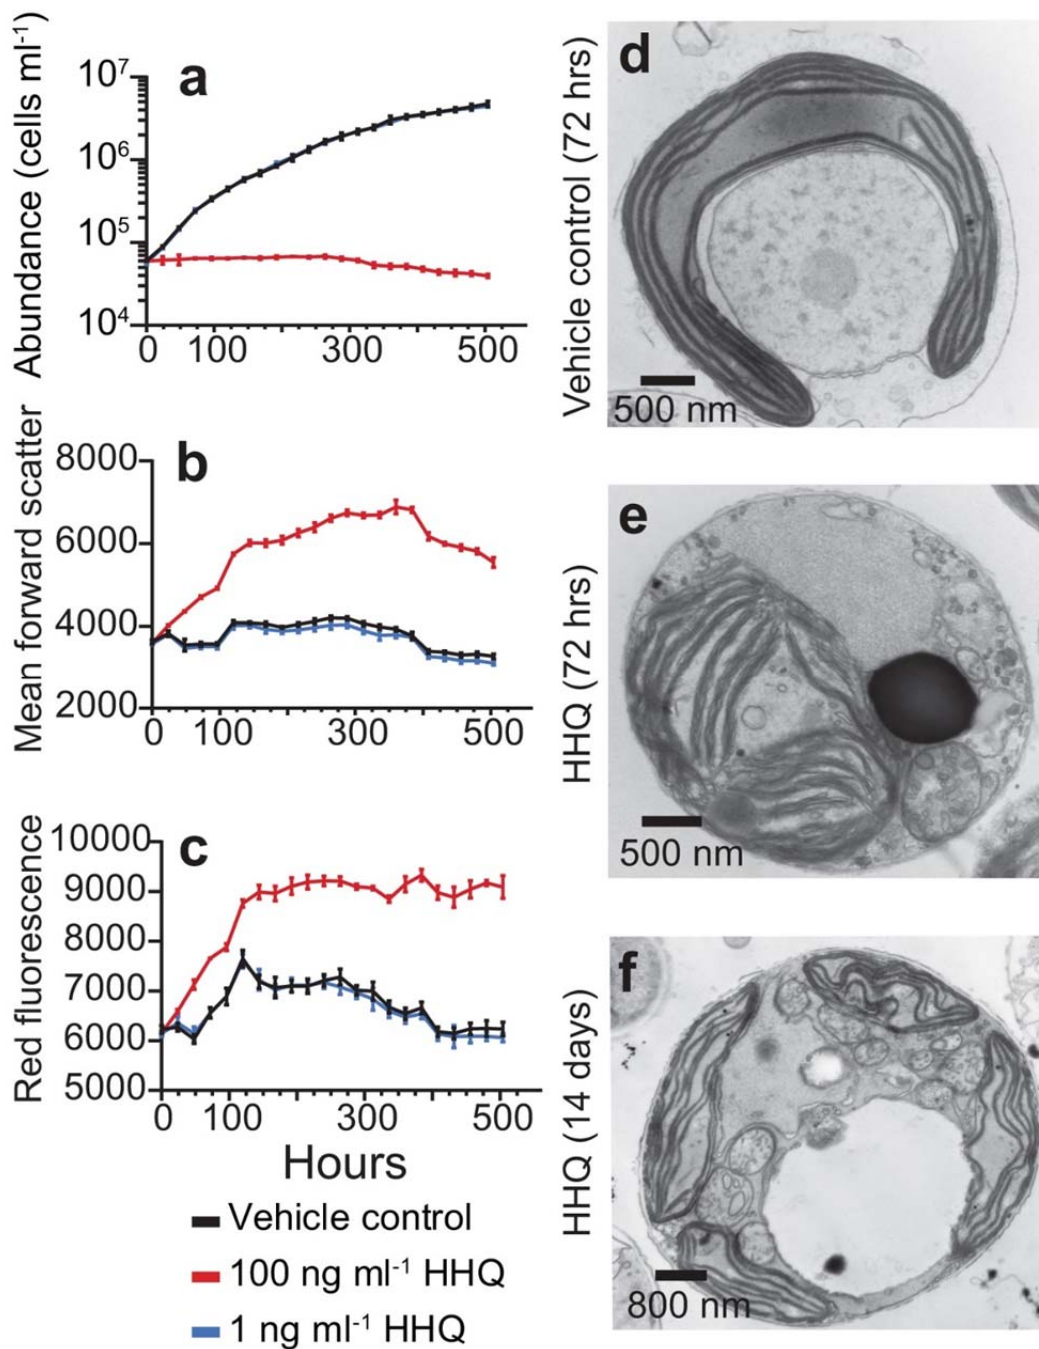

788

789

790

791

792

793 **Figure 2.** Comparison of  $\log_2$  fold changes in transcript ( $x$ -axis) and protein ( $y$ -axis) expression  
 794 from *E. huxleyi* cultures ( $N = 4$ ) following exposure to  $100 \text{ ng ml}^{-1}$  HHQ for 72 h compared to  
 795 the vehicle control (DMSO). Only shared differentially expressed transcripts (Wald test,  $q$ -value  
 796  $< 0.05$ ) and proteins (Welch's approximate t-test,  $q$ -value  $< 0.05$ ) are shown. Transcripts and  
 797 proteins with similar functions are colored via gene ontology (GO) annotation according to the  
 798 curated groupings shown in Dataset S2. Genes and proteins without GO annotations or  
 799 annotations outside of the selected groupings are shown in grey. Selected outliers are labeled in  
 800 black.

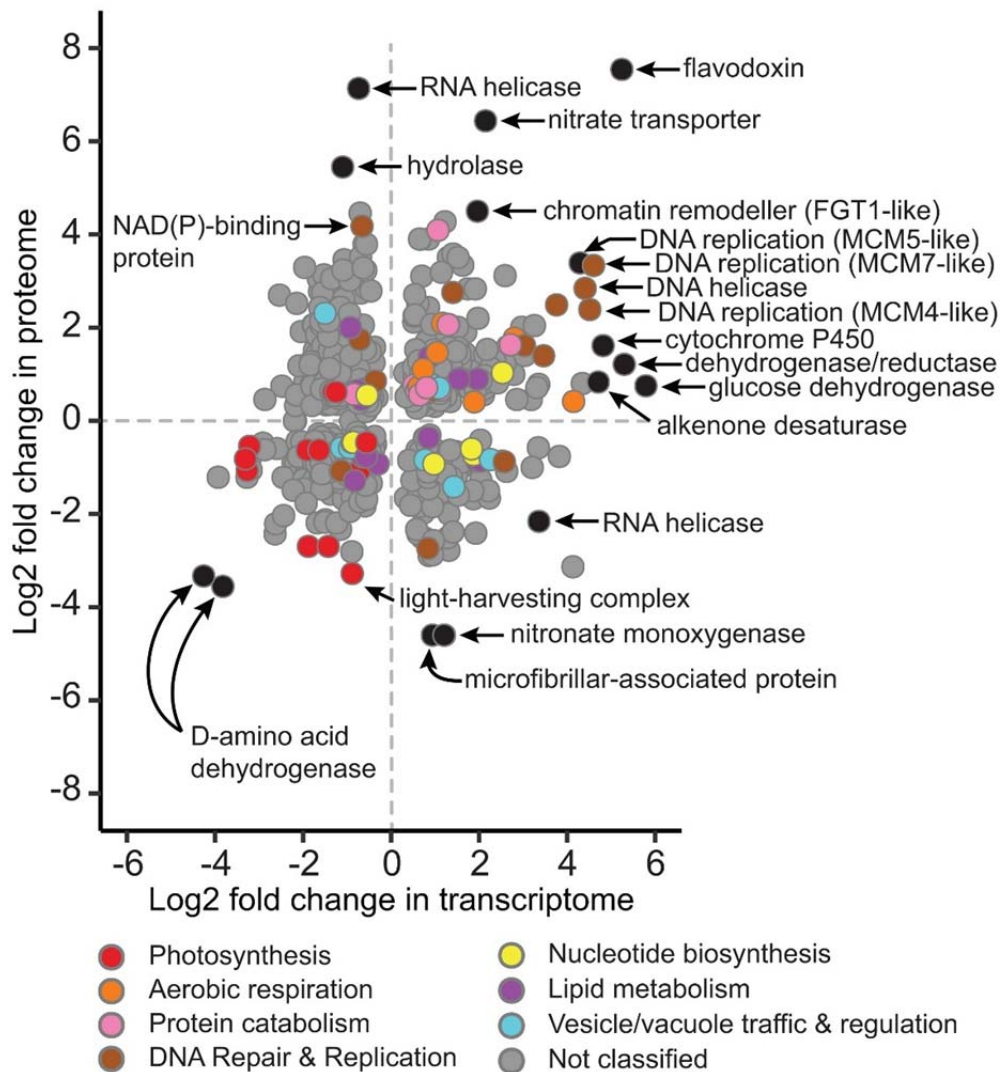

802 **Figure 3.** Quantification of cell cycle stage following HHQ exposure. *E. huxleyi* cultures (N = 3)  
803 were exposed to either vehicle control (DMSO) (a) or 100 ng ml<sup>-1</sup> HHQ (b) for 96 h and their  
804 DNA content was profiled to determine their cell stage.

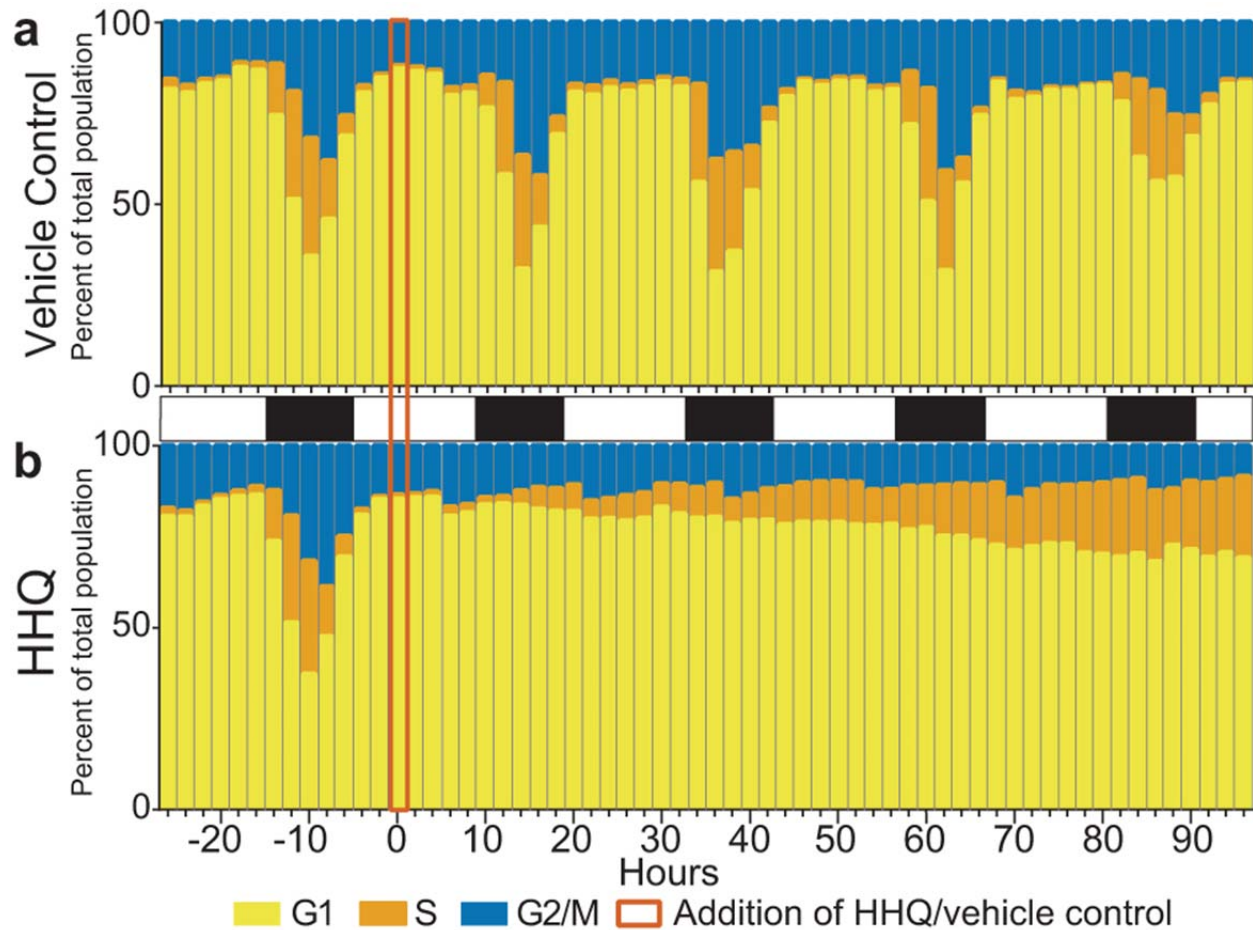

805

806

807

808

809

810

811



812 **Figure 4.** Schematic displaying the significant increases (blue) and decreases (red) in transcript  
813 (Wald test,  $q$ -value  $> 0.05$ ) and protein (Welch's t-test,  $q$ -value  $< 0.05$ ) abundance following  
814 HHQ exposure in *E. huxleyi* cultures relative to vehicle control (DMSO). The interior color of  
815 shapes and arrows denote significant transcript changes, while the outline color of shapes or  
816 arrows denotes significant protein changes. Grey shapes or outlines indicate no differential  
817 expression was noted at any time point. [Nucleus] *PARP*: Poly (ADP-ribose) polymerase;  
818 *TOPO*: Topoisomerase. [Chloroplast] *Fd*: Ferredoxin; *FNR*: Ferredoxin-NADP<sup>+</sup> oxidoreductase;  
819 *Fd-NR*: Ferredoxin nitrite reductase; *VitB6*: pyridoxine biosynthesis protein; *sFNR*: soluble  
820 ferredoxin-NADP<sup>+</sup> oxidoreductase; *Fld*: Flavodoxin, *GR*: Glutathione reductase; *GSH*:  
821 Glutathione. [Cytosol] *KDPG*: 2-Keto-3-deoxy-6-phosphogluconate; *PRPP*: Phosphoribosyl  
822 pyrophosphate; *DHODH*: Dihydroorotate dehydrogenase. [Mitochondria] TCA cycle:  
823 Tricarboxylic acid cycle; *Mn-SOD*: Manganese superoxide dismutase; ROS: Reactive oxygen  
824 species; *GOT*: Glutamic oxaloacetic transaminase;  $\alpha$ -KG: Alpha-ketoglutarate; *P5C*: pyrroline-5-  
825 carboxylate; *P5CR*: pyrroline-5-carboxylate reductase; *POX*: Proline oxidase. [Cell Cycle] *Chk1*:  
826 Serine/threonine-protein kinase Chk1; *Chk2*: Serine/threonine-protein kinase Chk2; *CDC6*: Cell  
827 division control protein 6; *ORC1*: Origin recognition complex subunit 1. Orange dots indicate  
828 potential targets of parylation by PARP proteins.

829

830

831

832

833

834

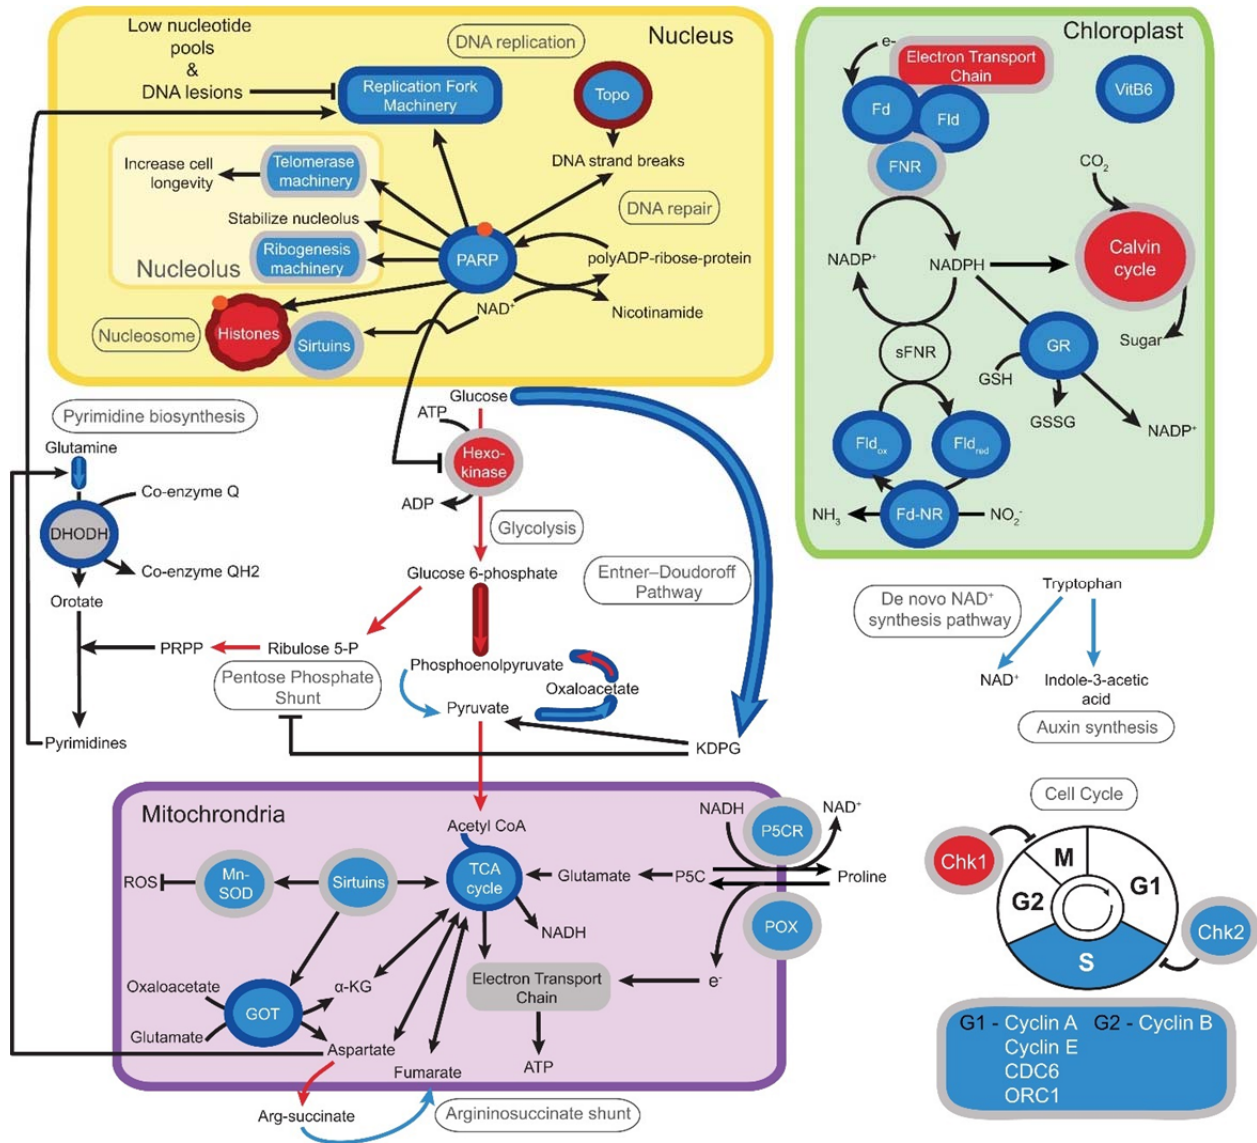

835

836

837

838

839

840

841

842 **Figure 5.** Inhibition of viral-induced mortality in the presence of HHQ. *E. huxleyi* cultures (N=3)  
843 were exposed to either vehicle control (DMSO) or 100 ng ml<sup>-1</sup> HHQ in the presence and absence  
844 of viruses. Phytoplankton cellular abundance was measured via flow cytometry and evaluated  
845 using ANOVAR ( $p < 0.05$ ). Mean  $\pm$  standard deviation shown.

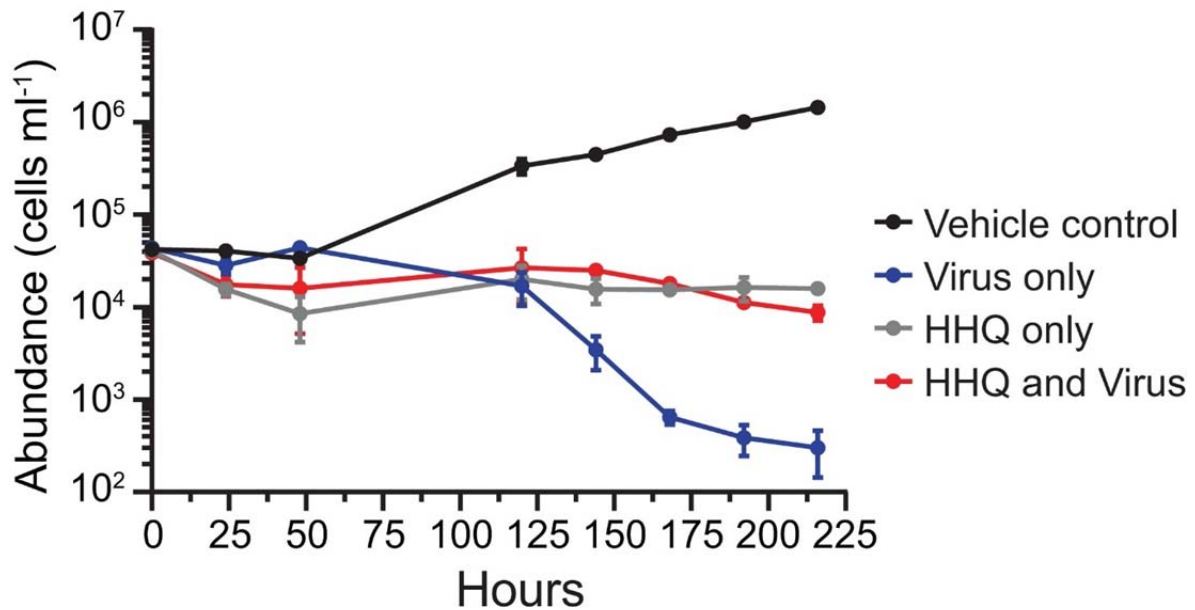

846

847

848

849

850

851

852

853

854

855

856 **Figure 6.** Detection of HHQ in the marine environment. (a) Cruise track of the U.S.  
857 GEOTRACES GP16 cruise in 2013 in the eastern southern tropical Pacific Ocean. (b) Grey bars  
858 indicated the concentration of HHQ from six stations along the cruise track. Circles indicate the  
859 percent relative abundance picoplankton (yellow) and micro- & nanoplankton (red).

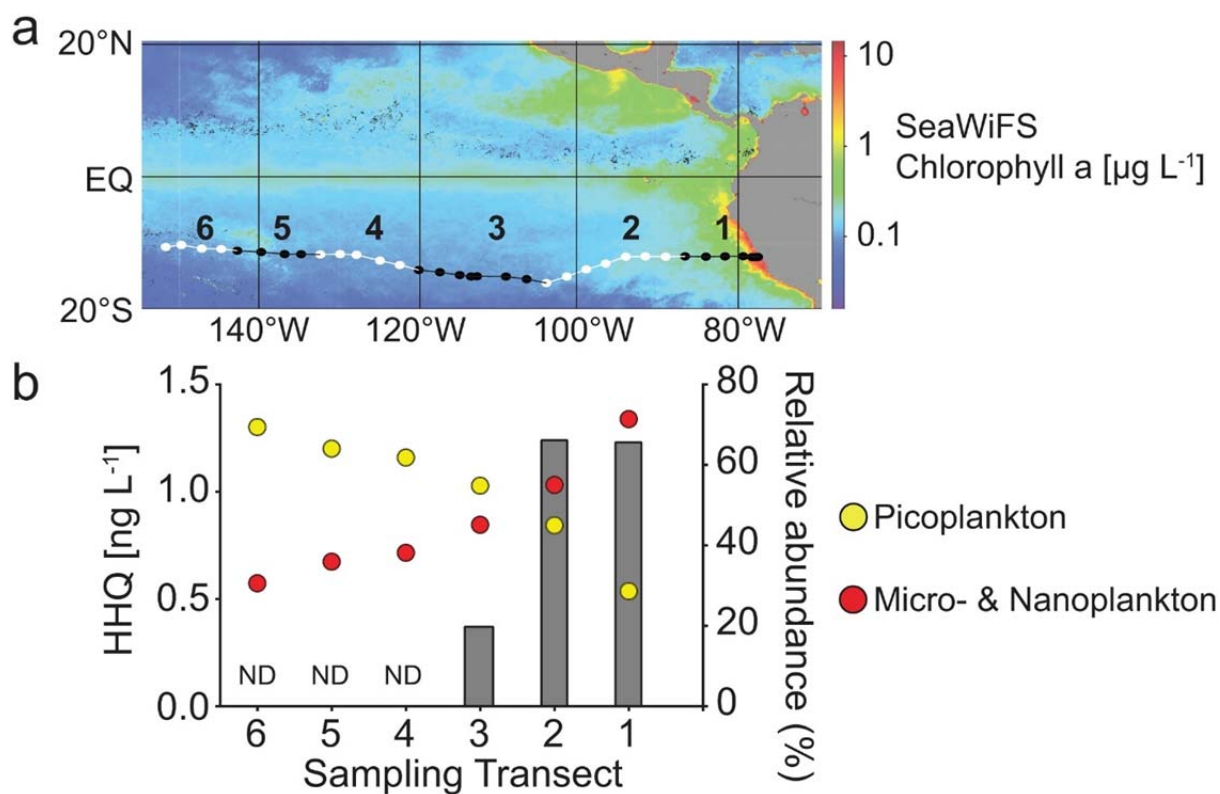

860

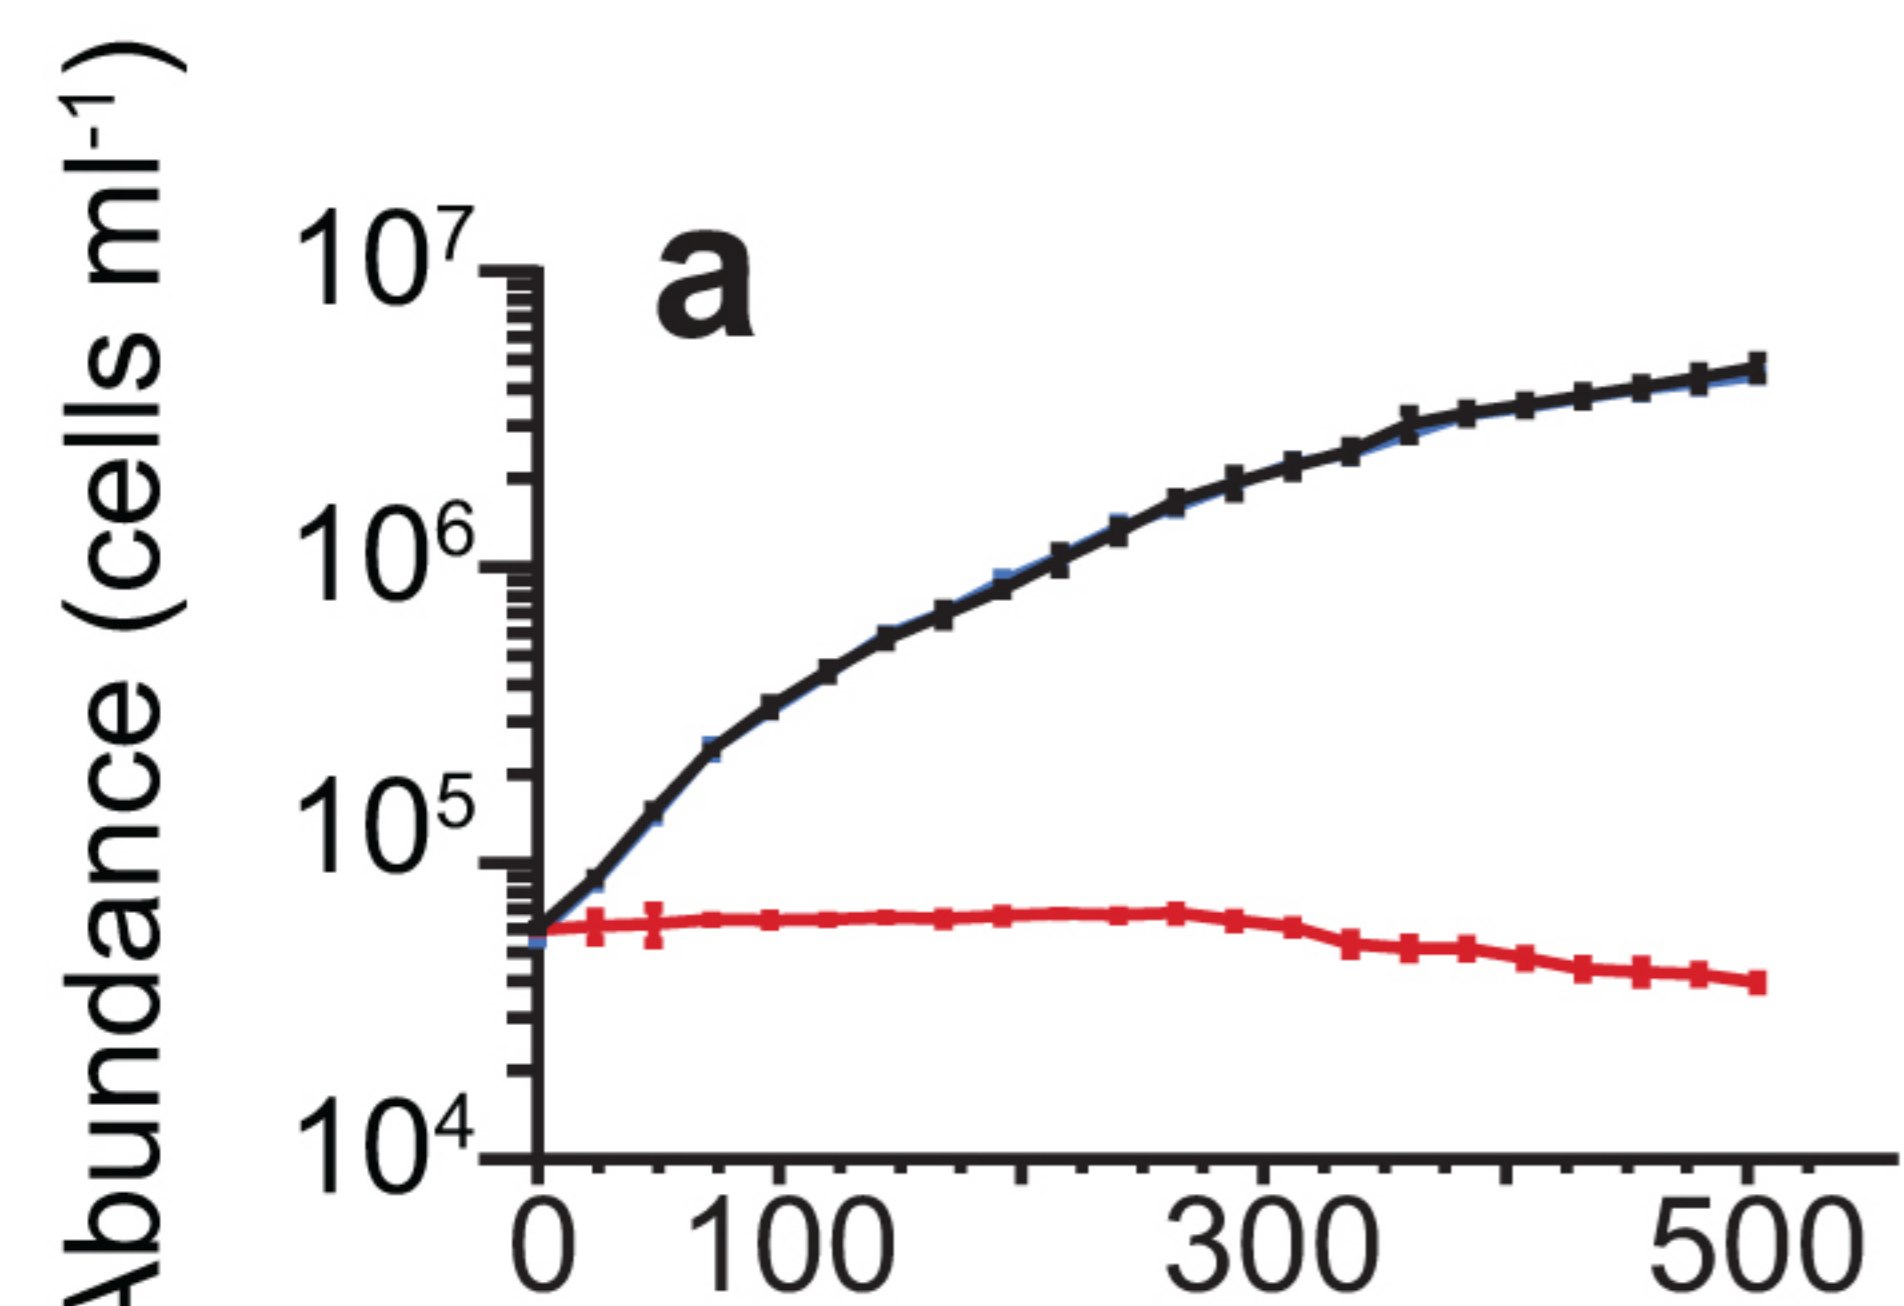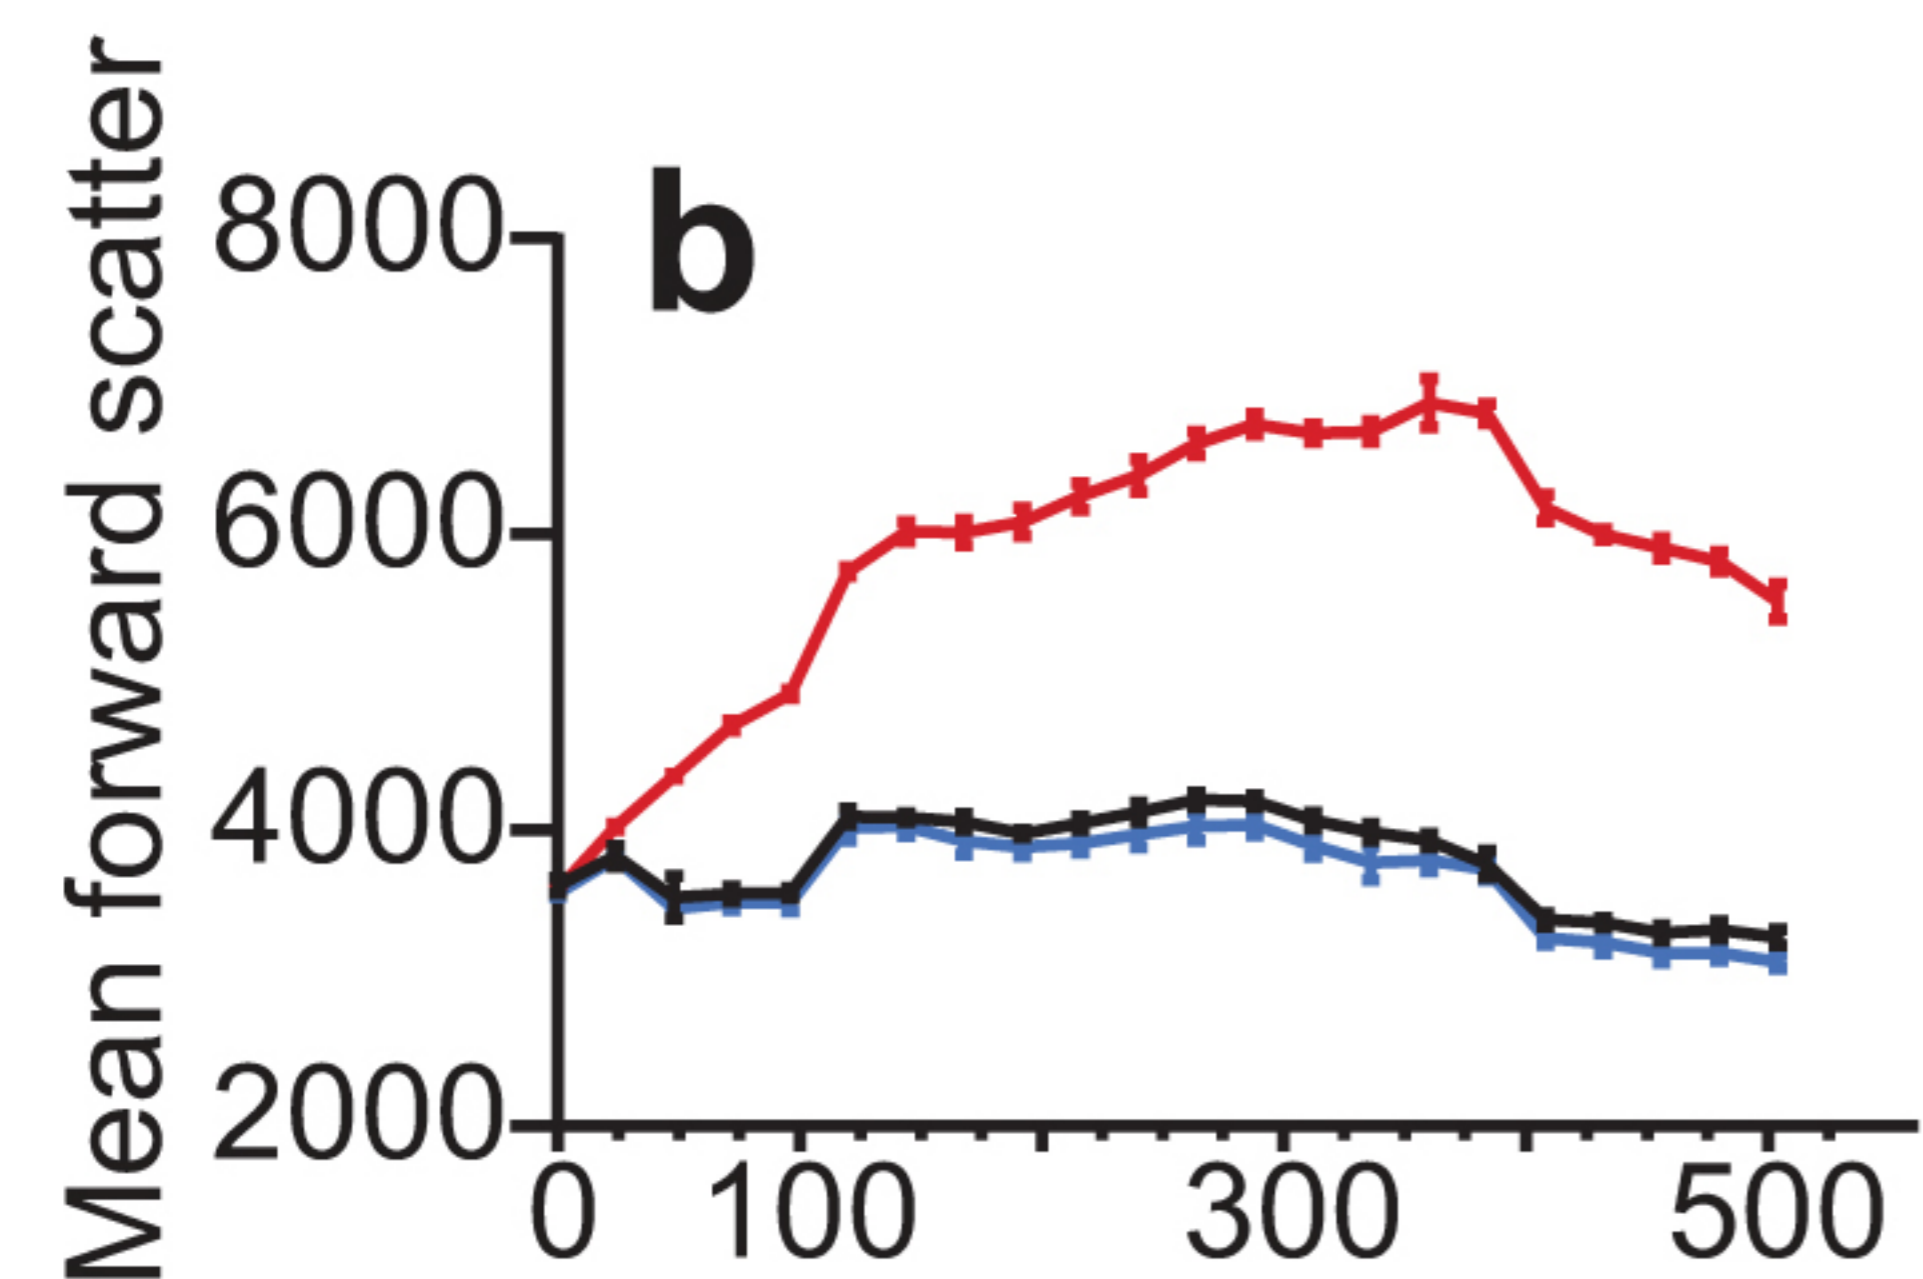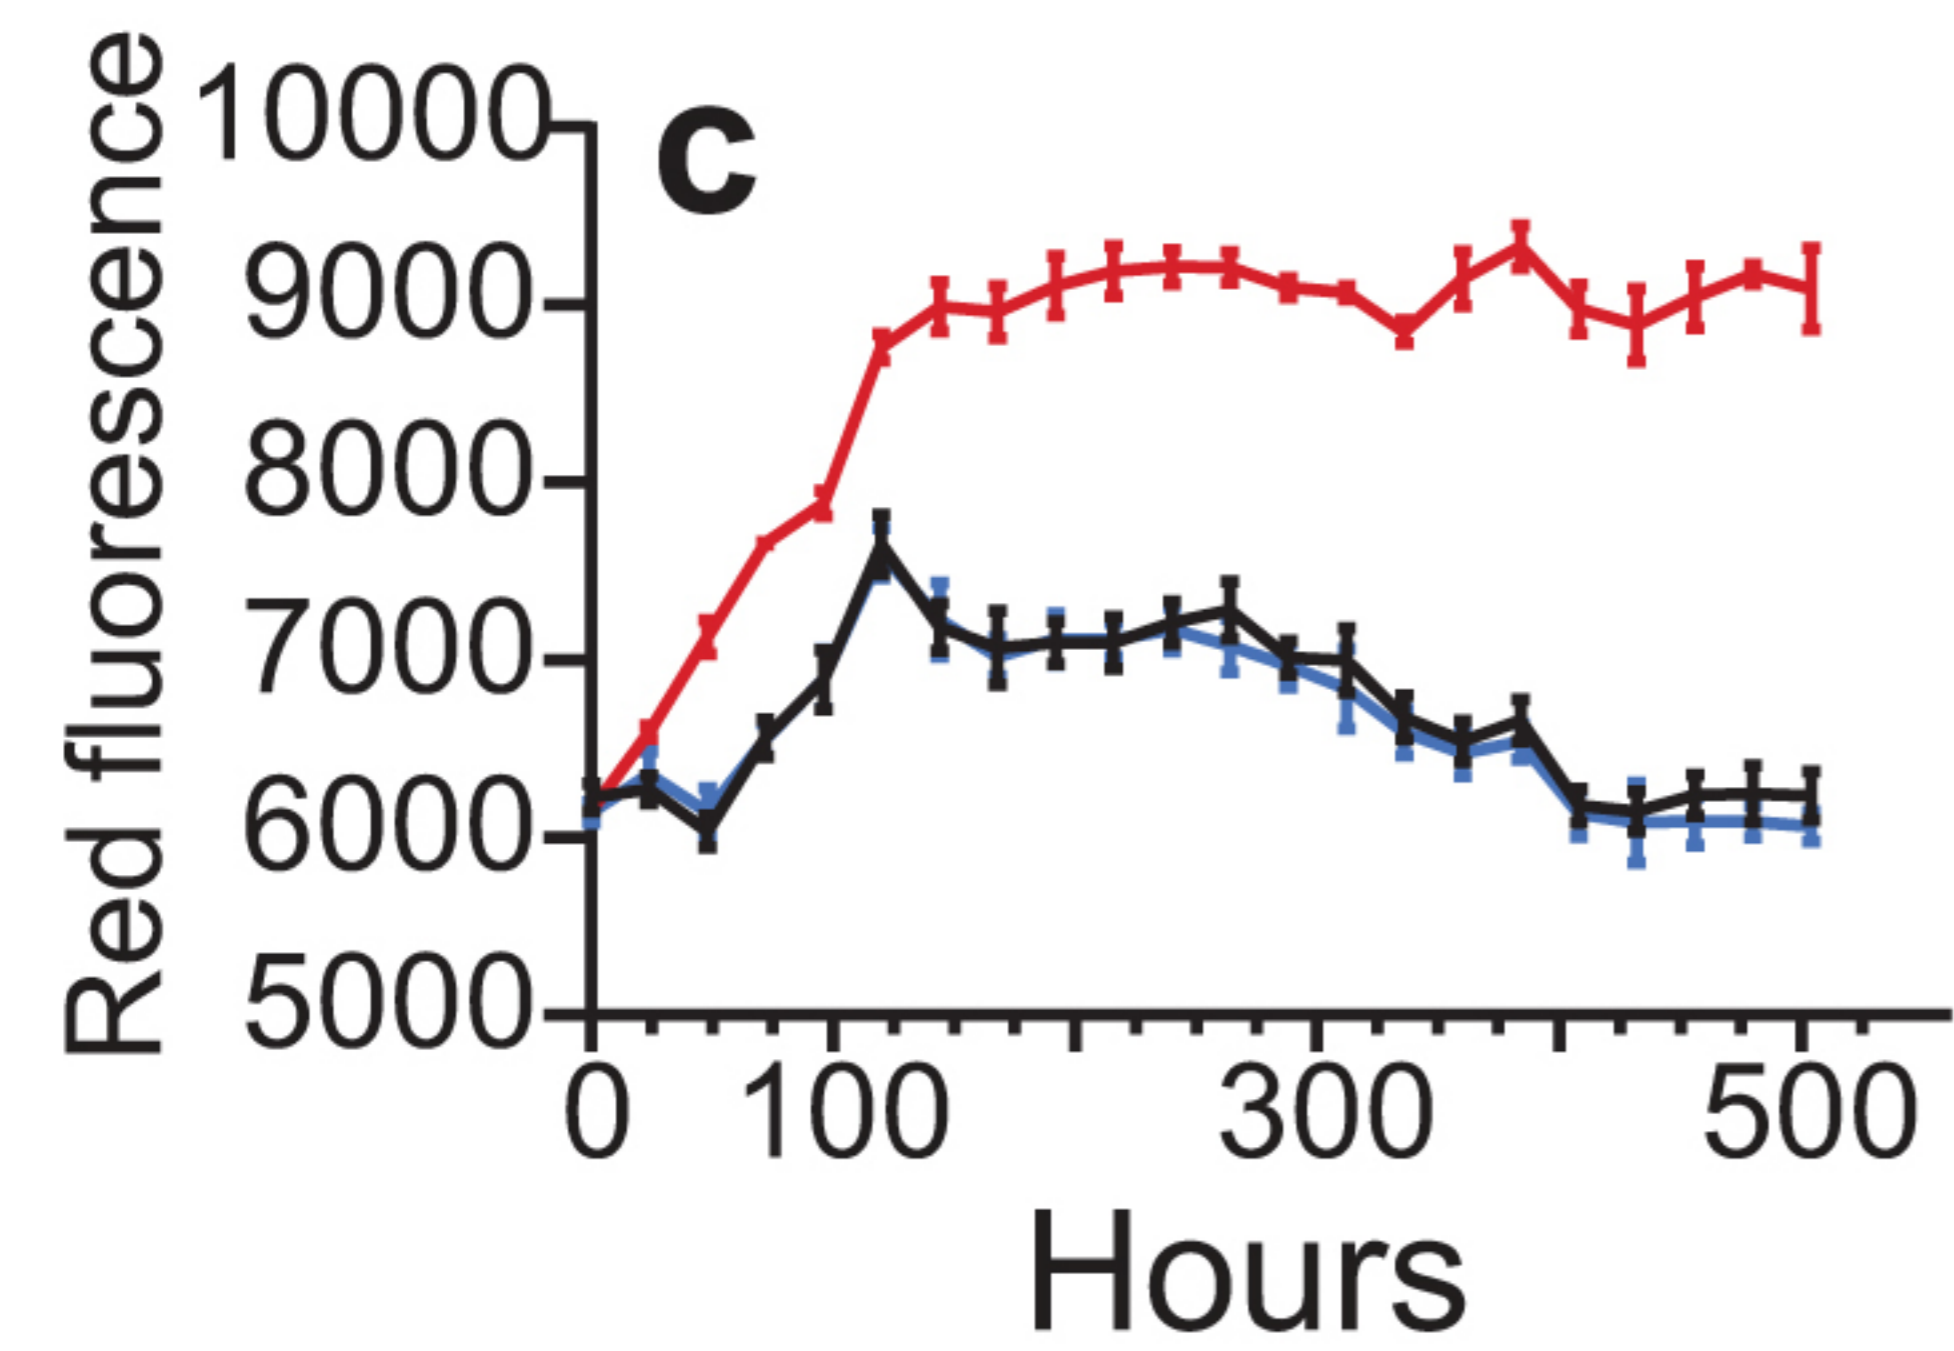

Vehicle control (72 hrs)

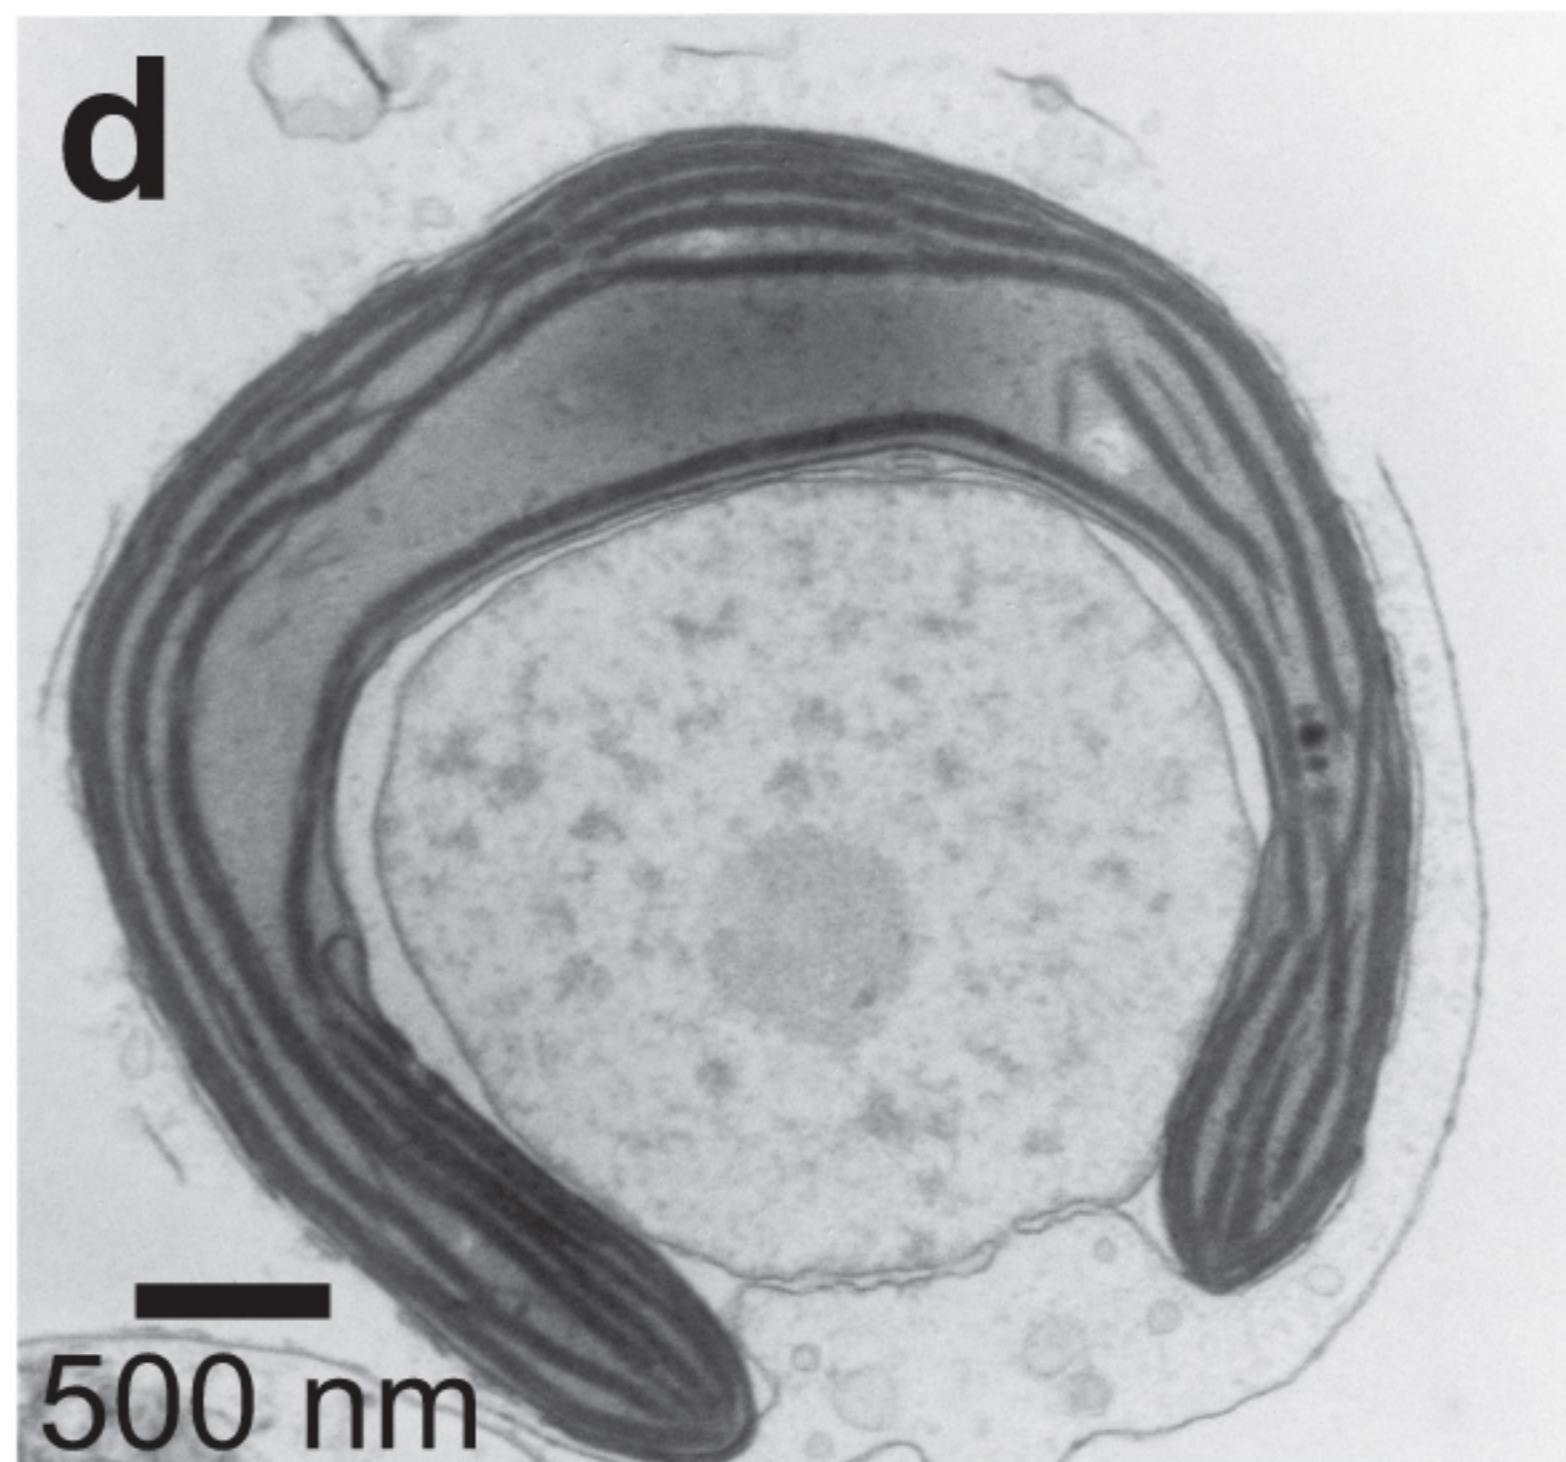

HHQ (72 hrs)

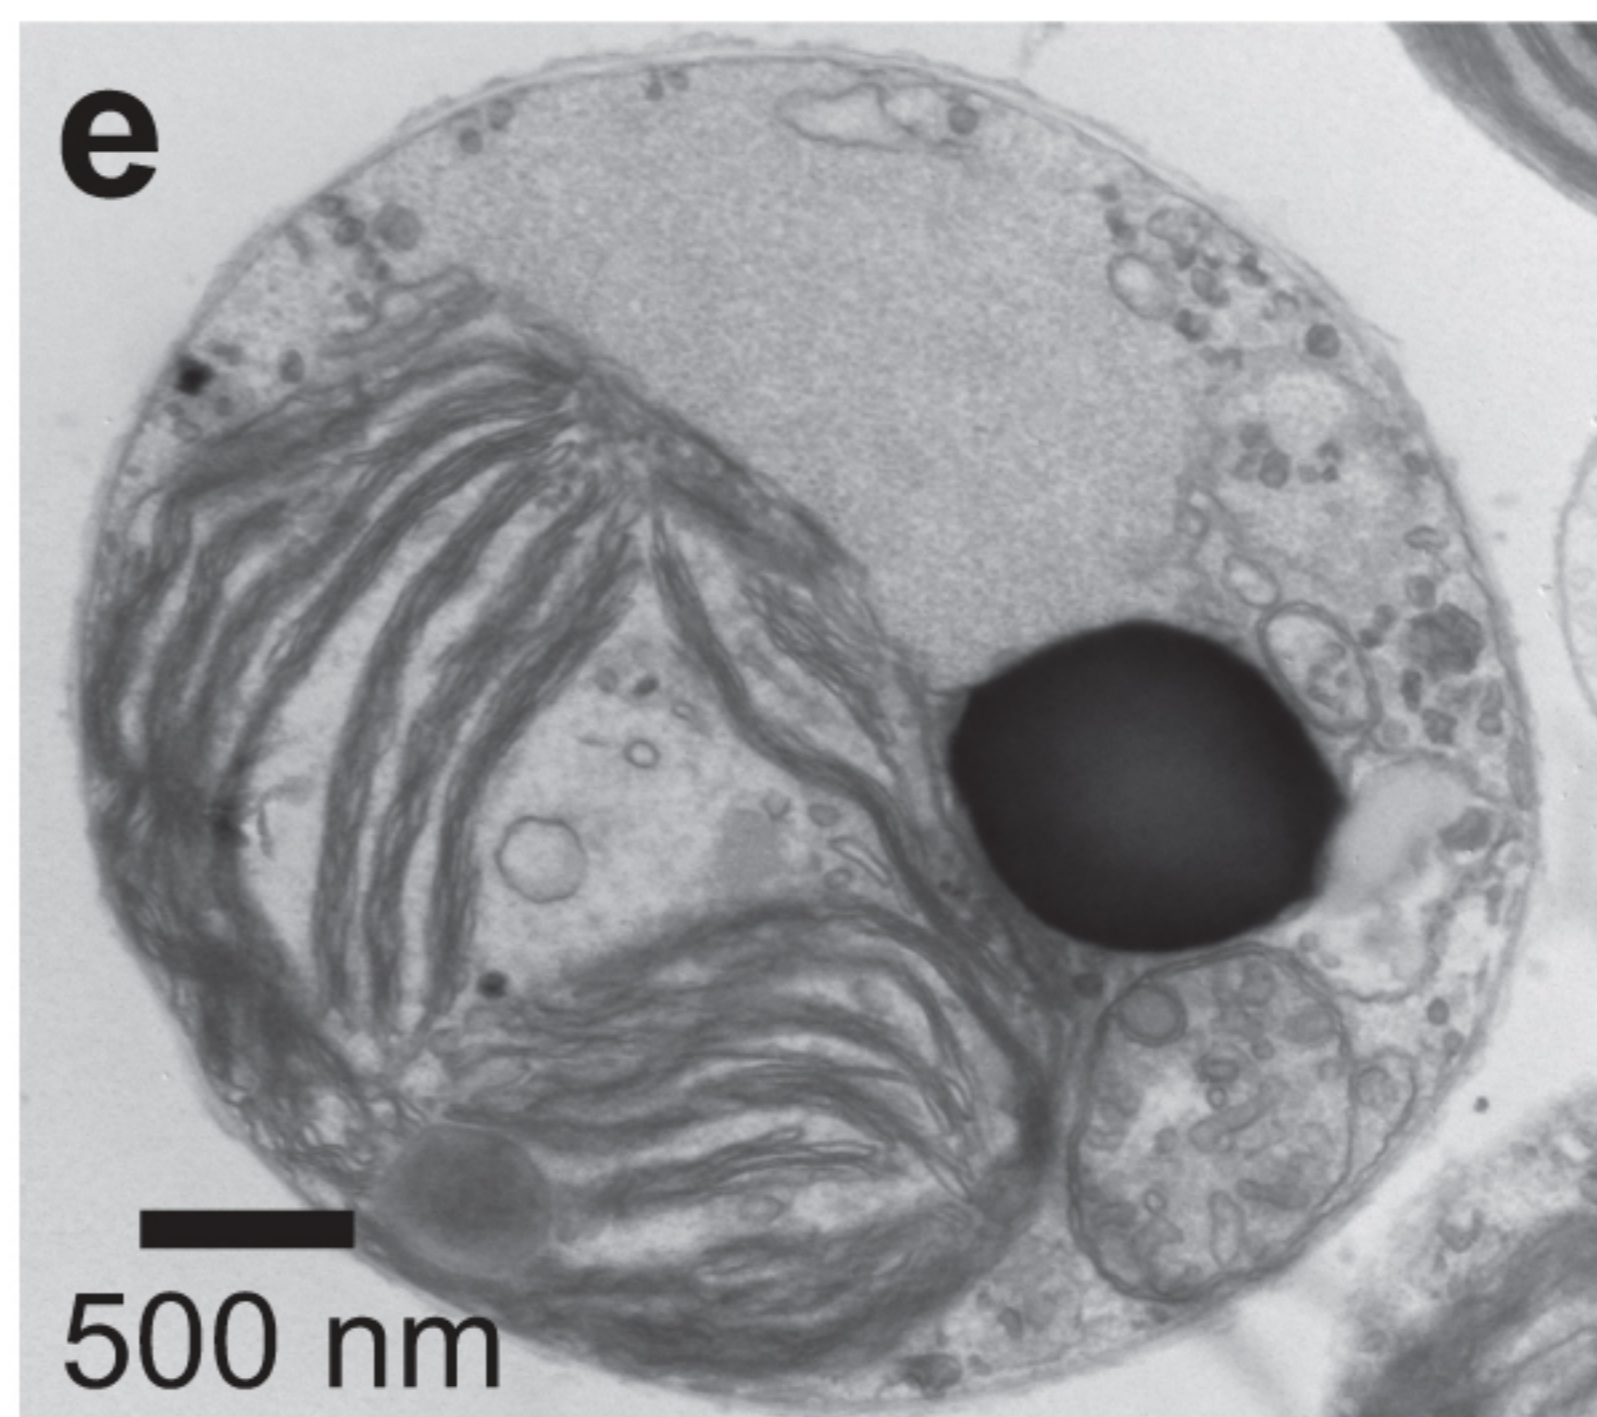

HHQ (14 days)

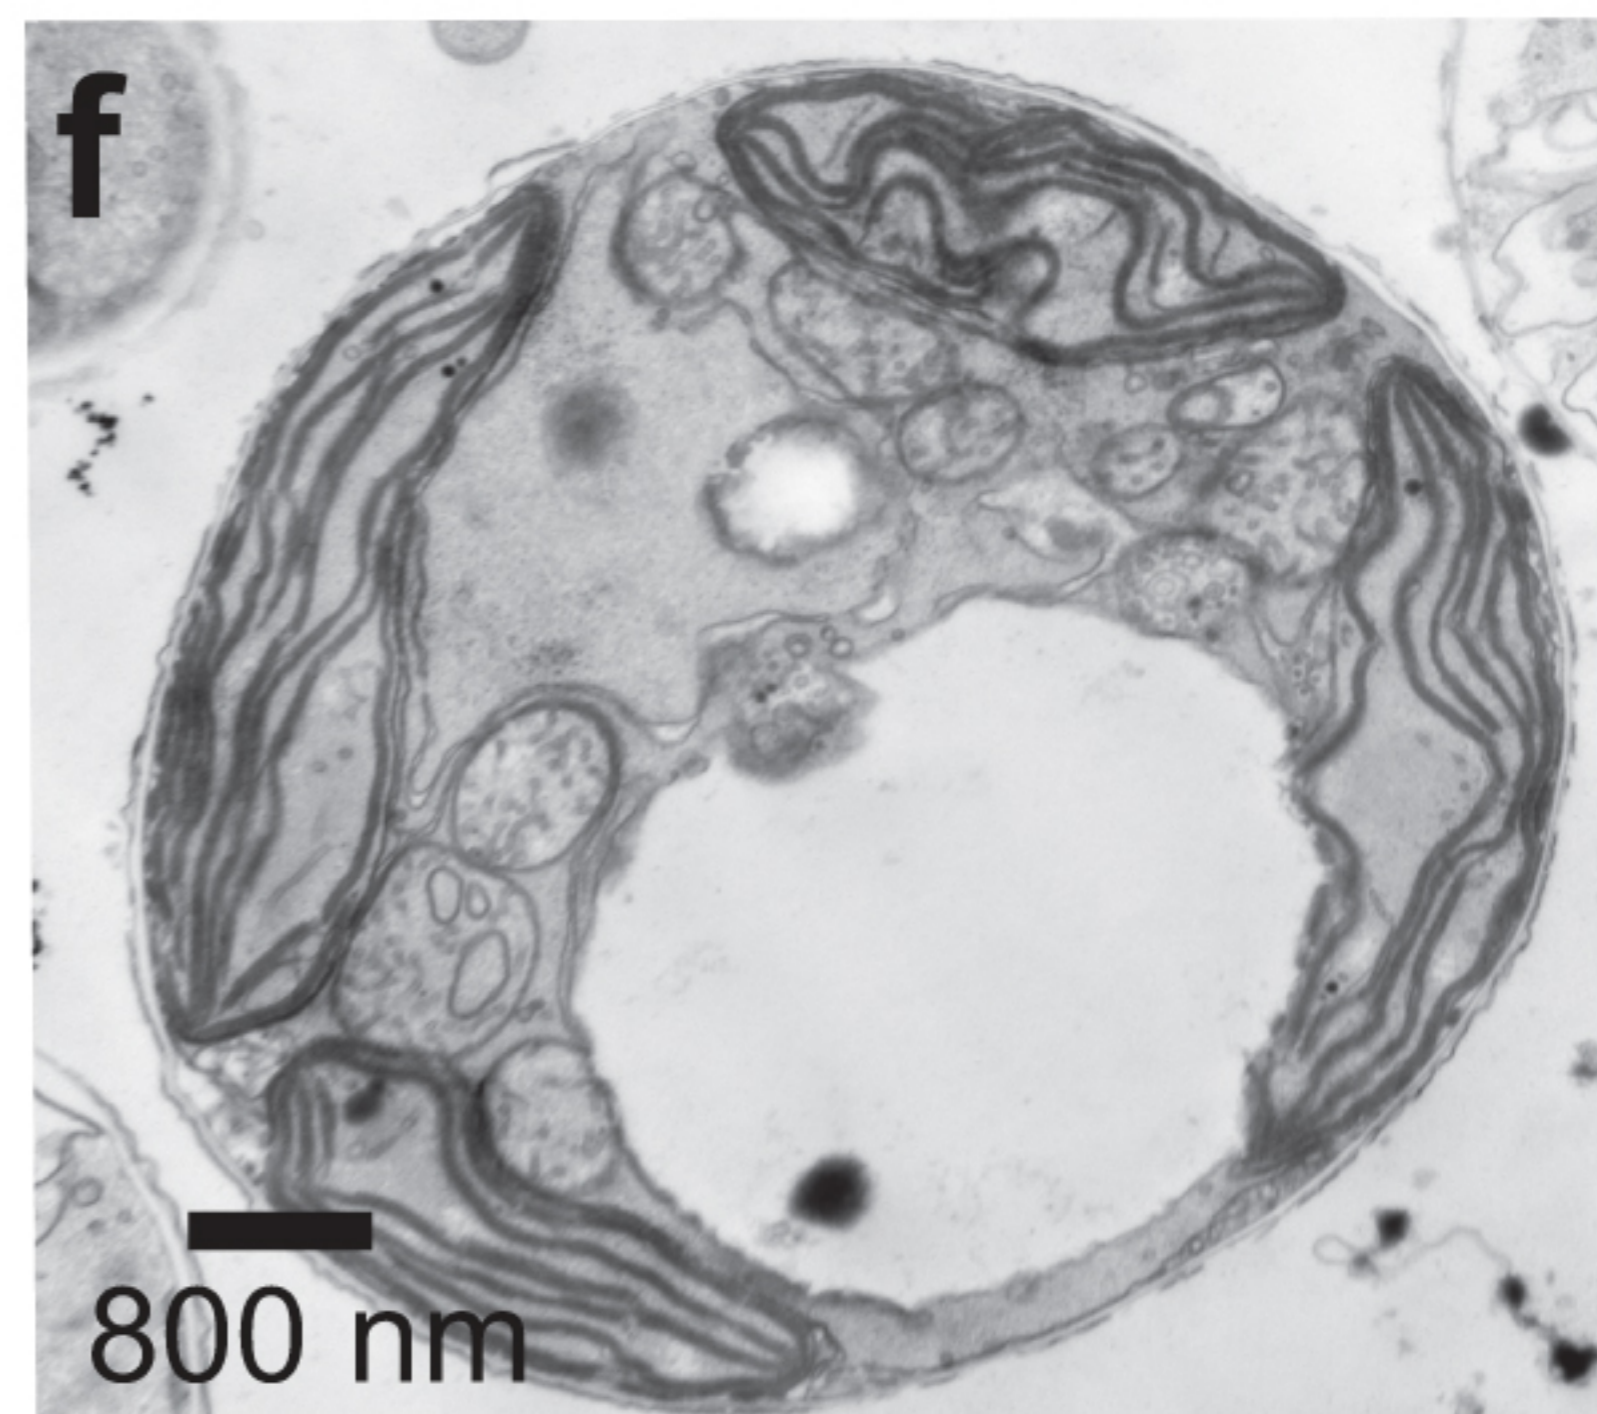

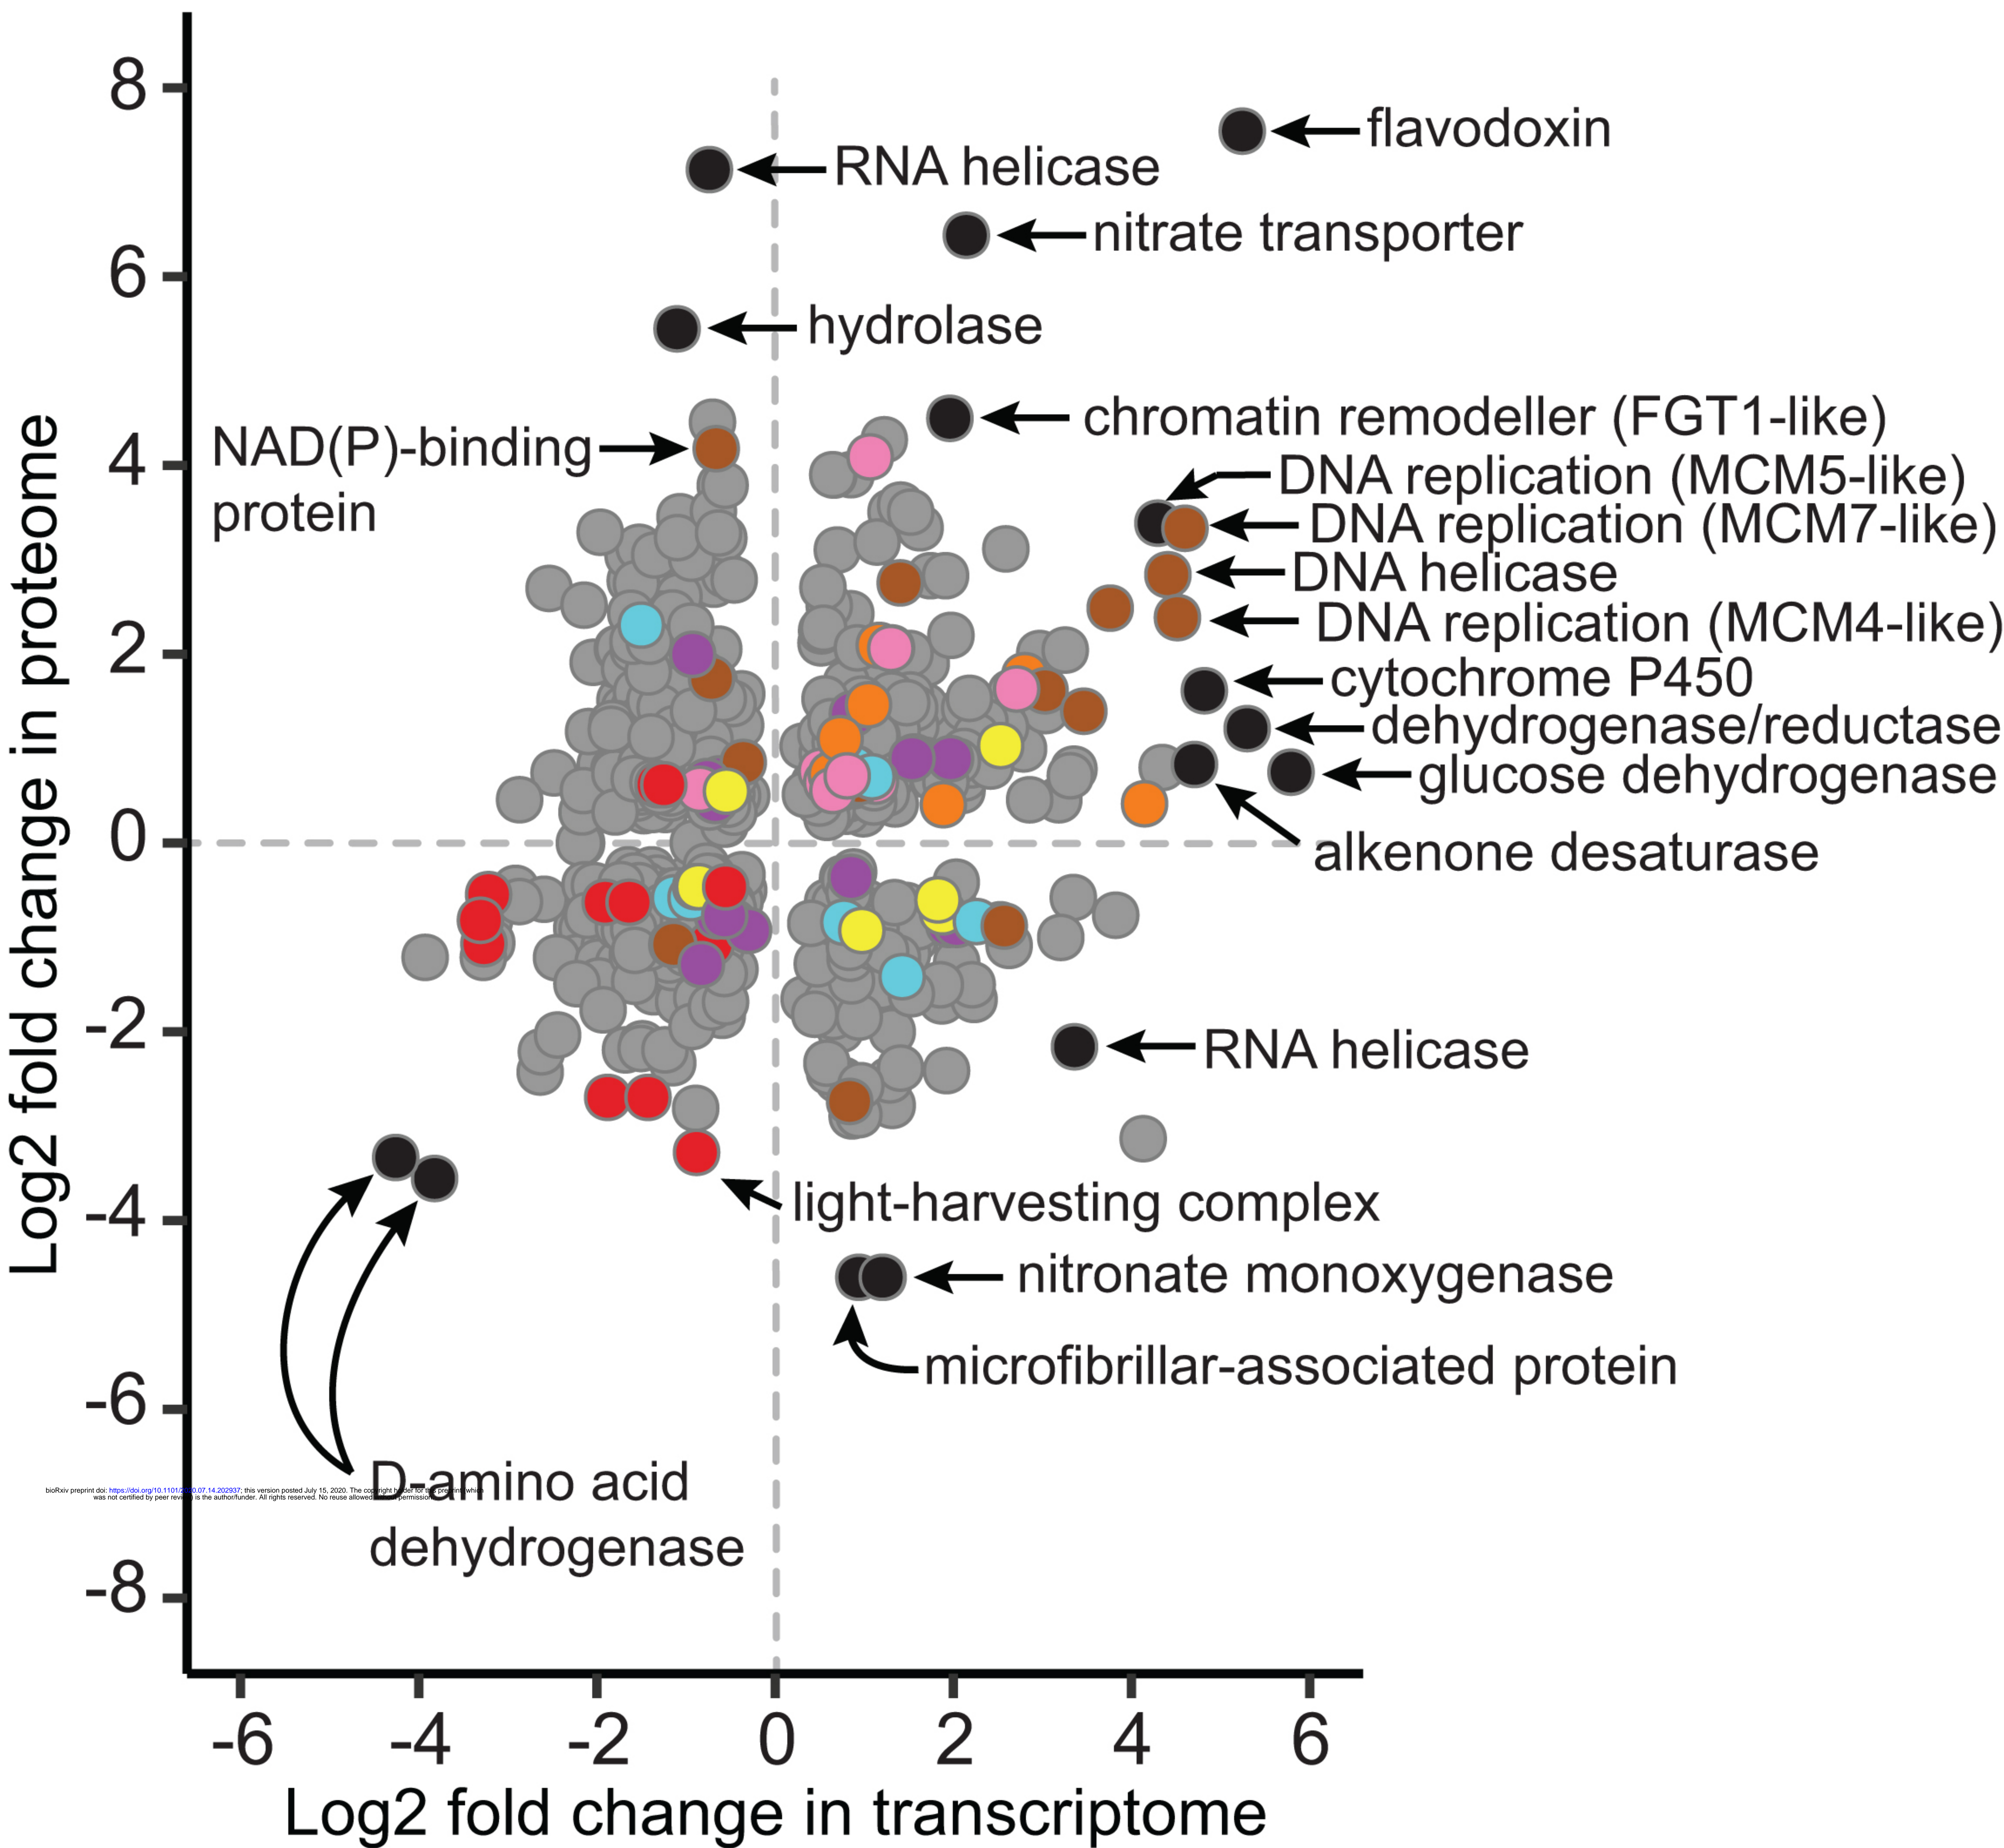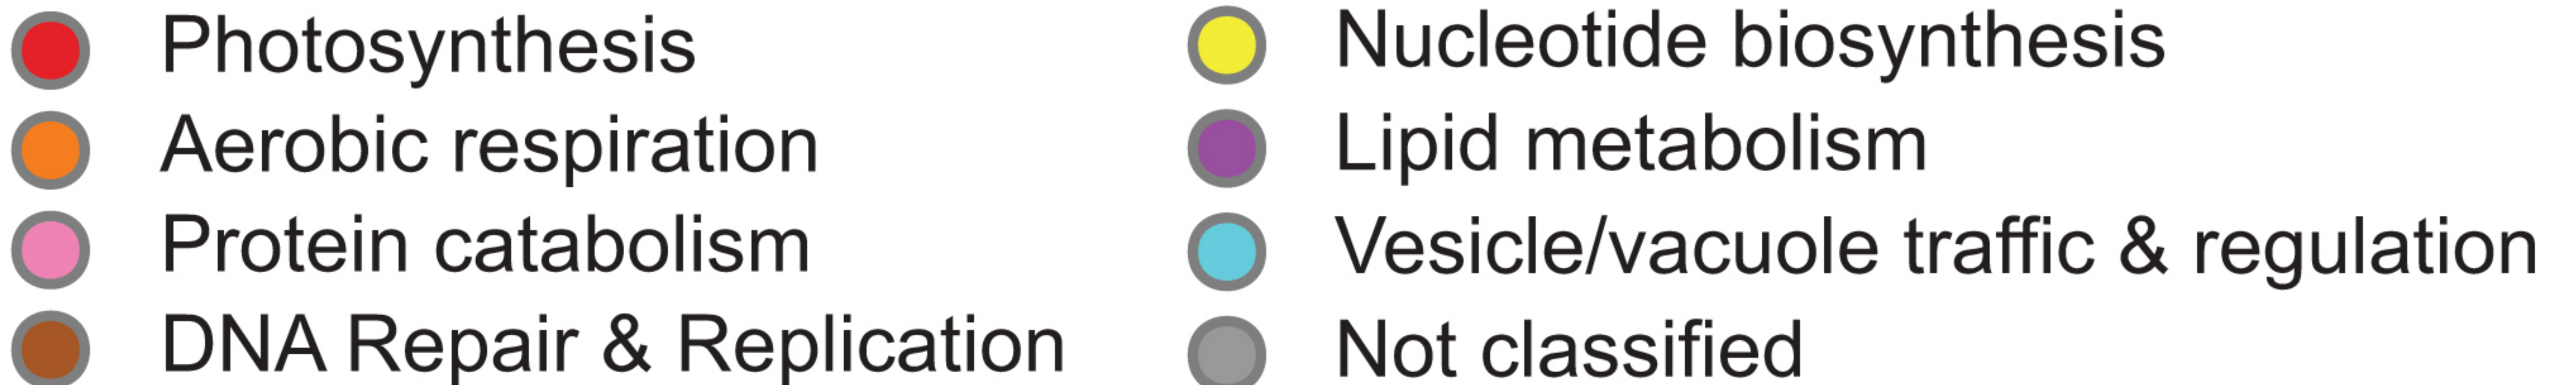

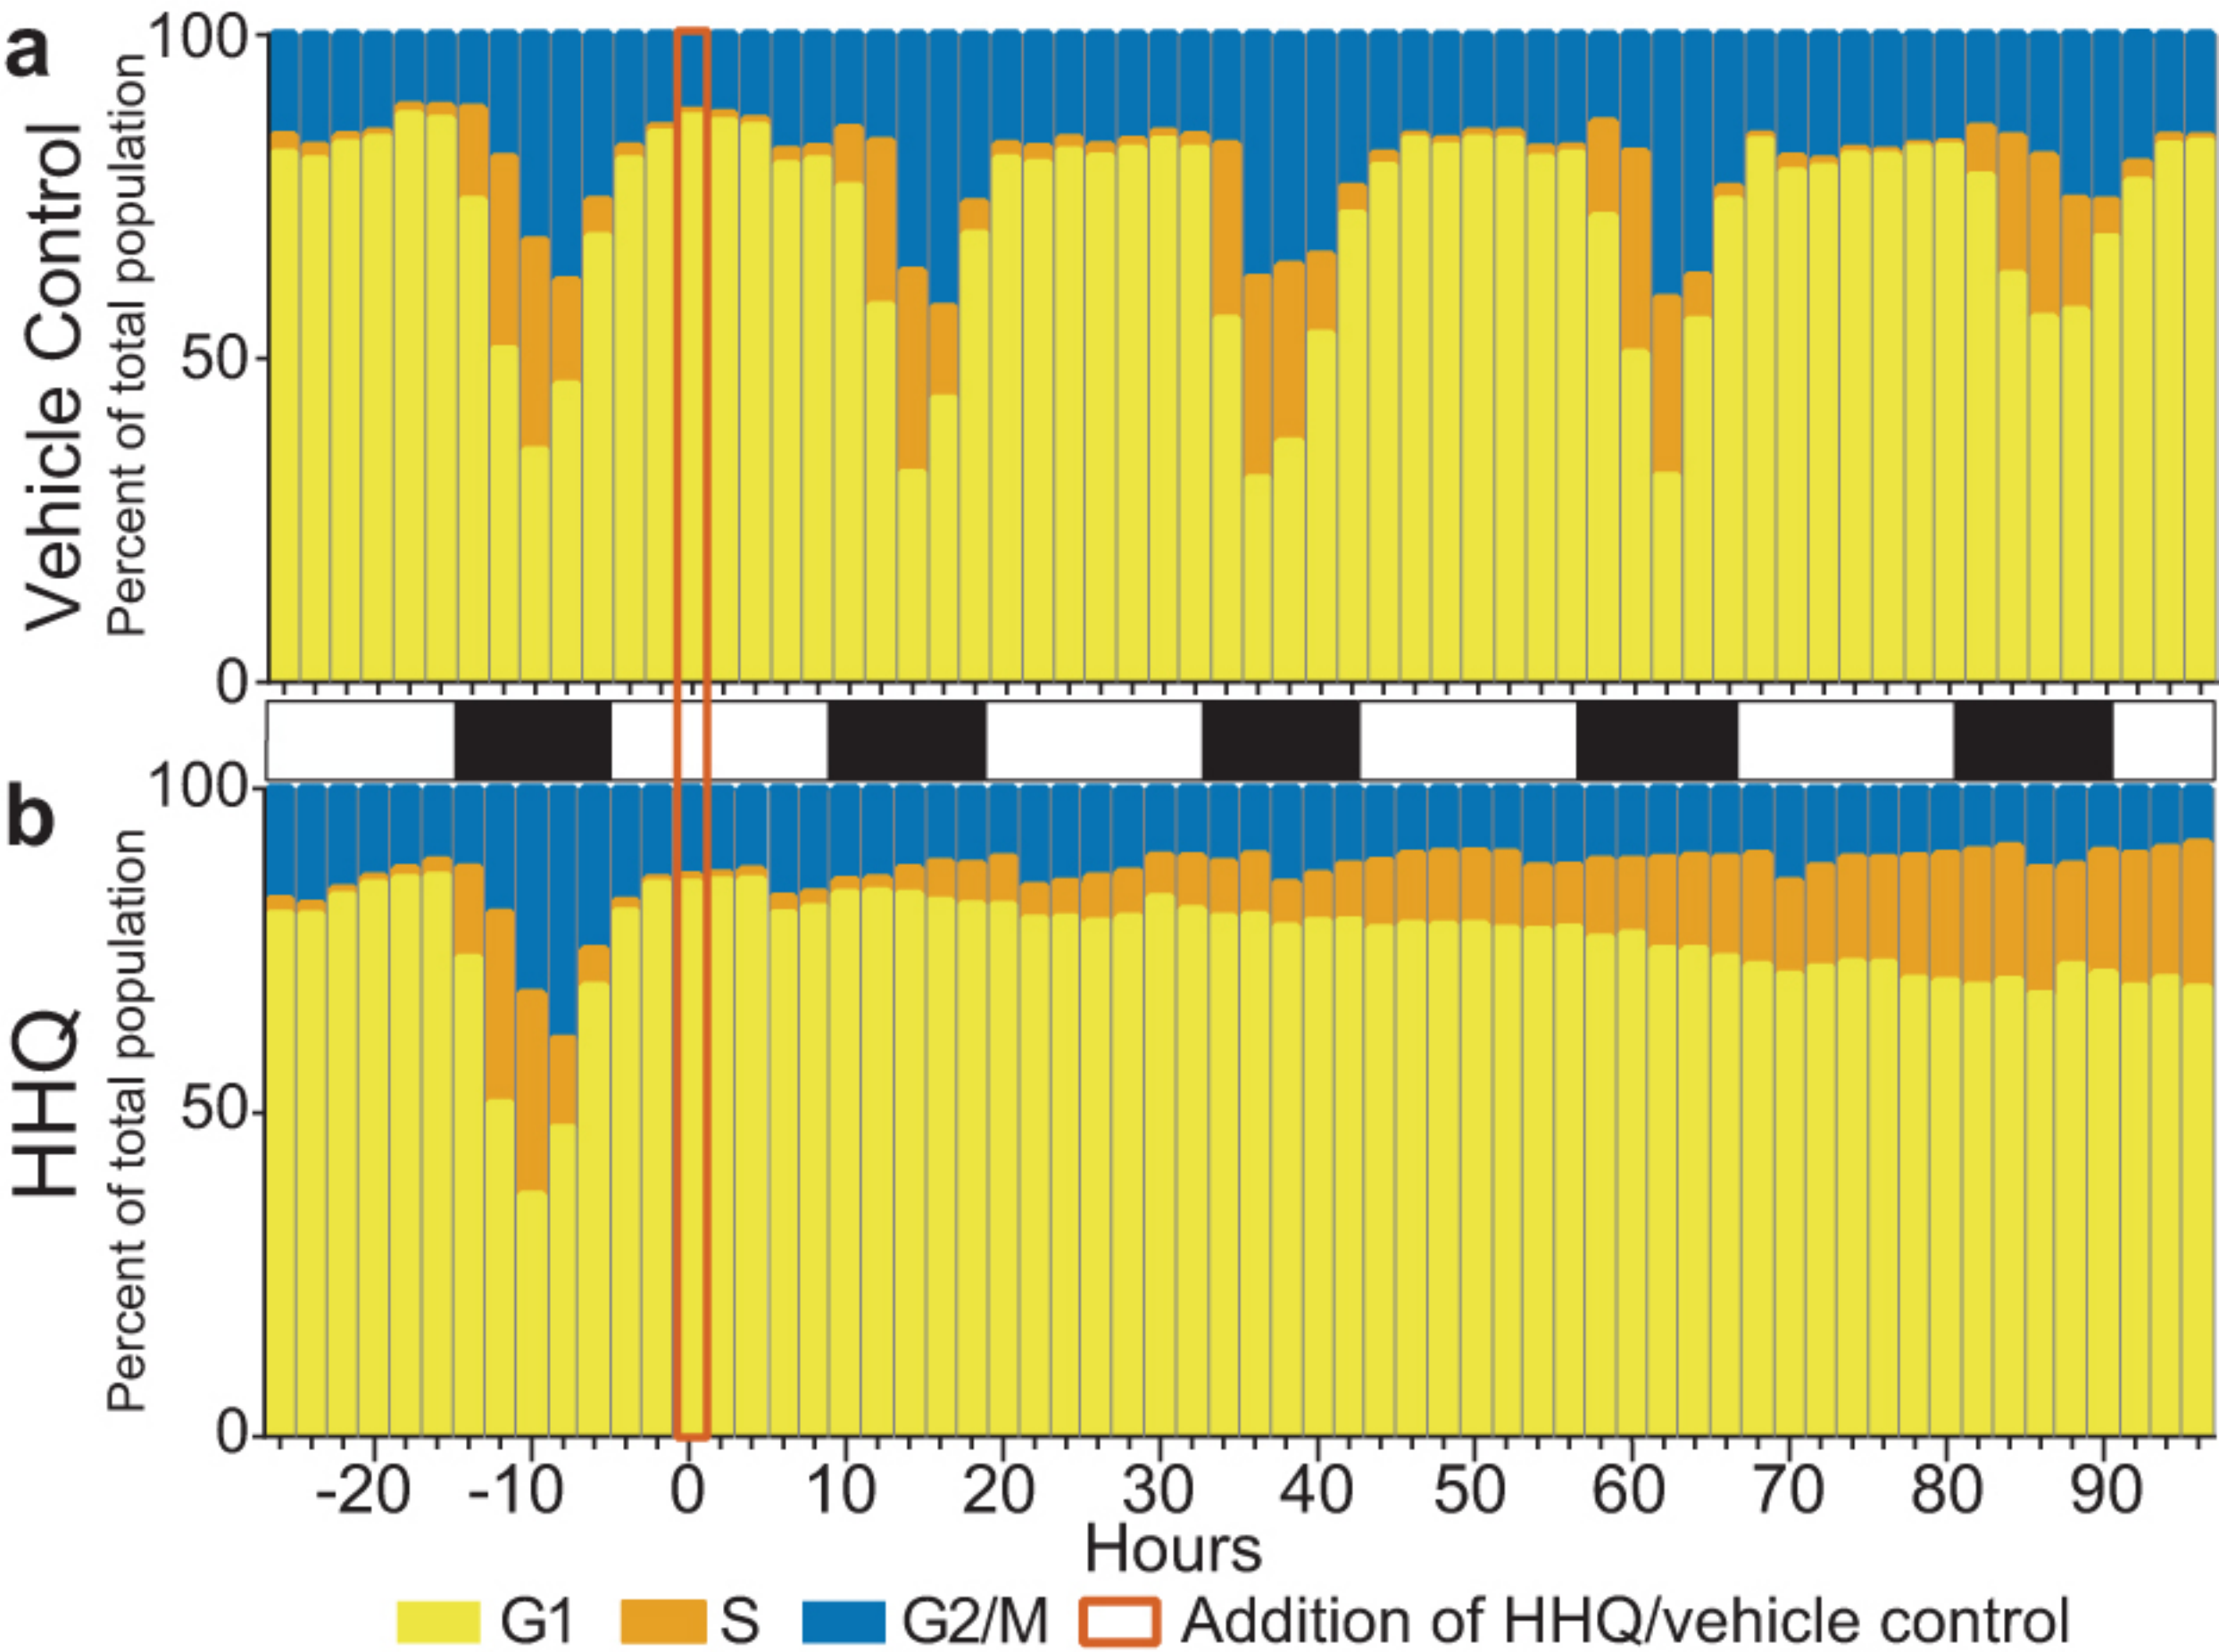

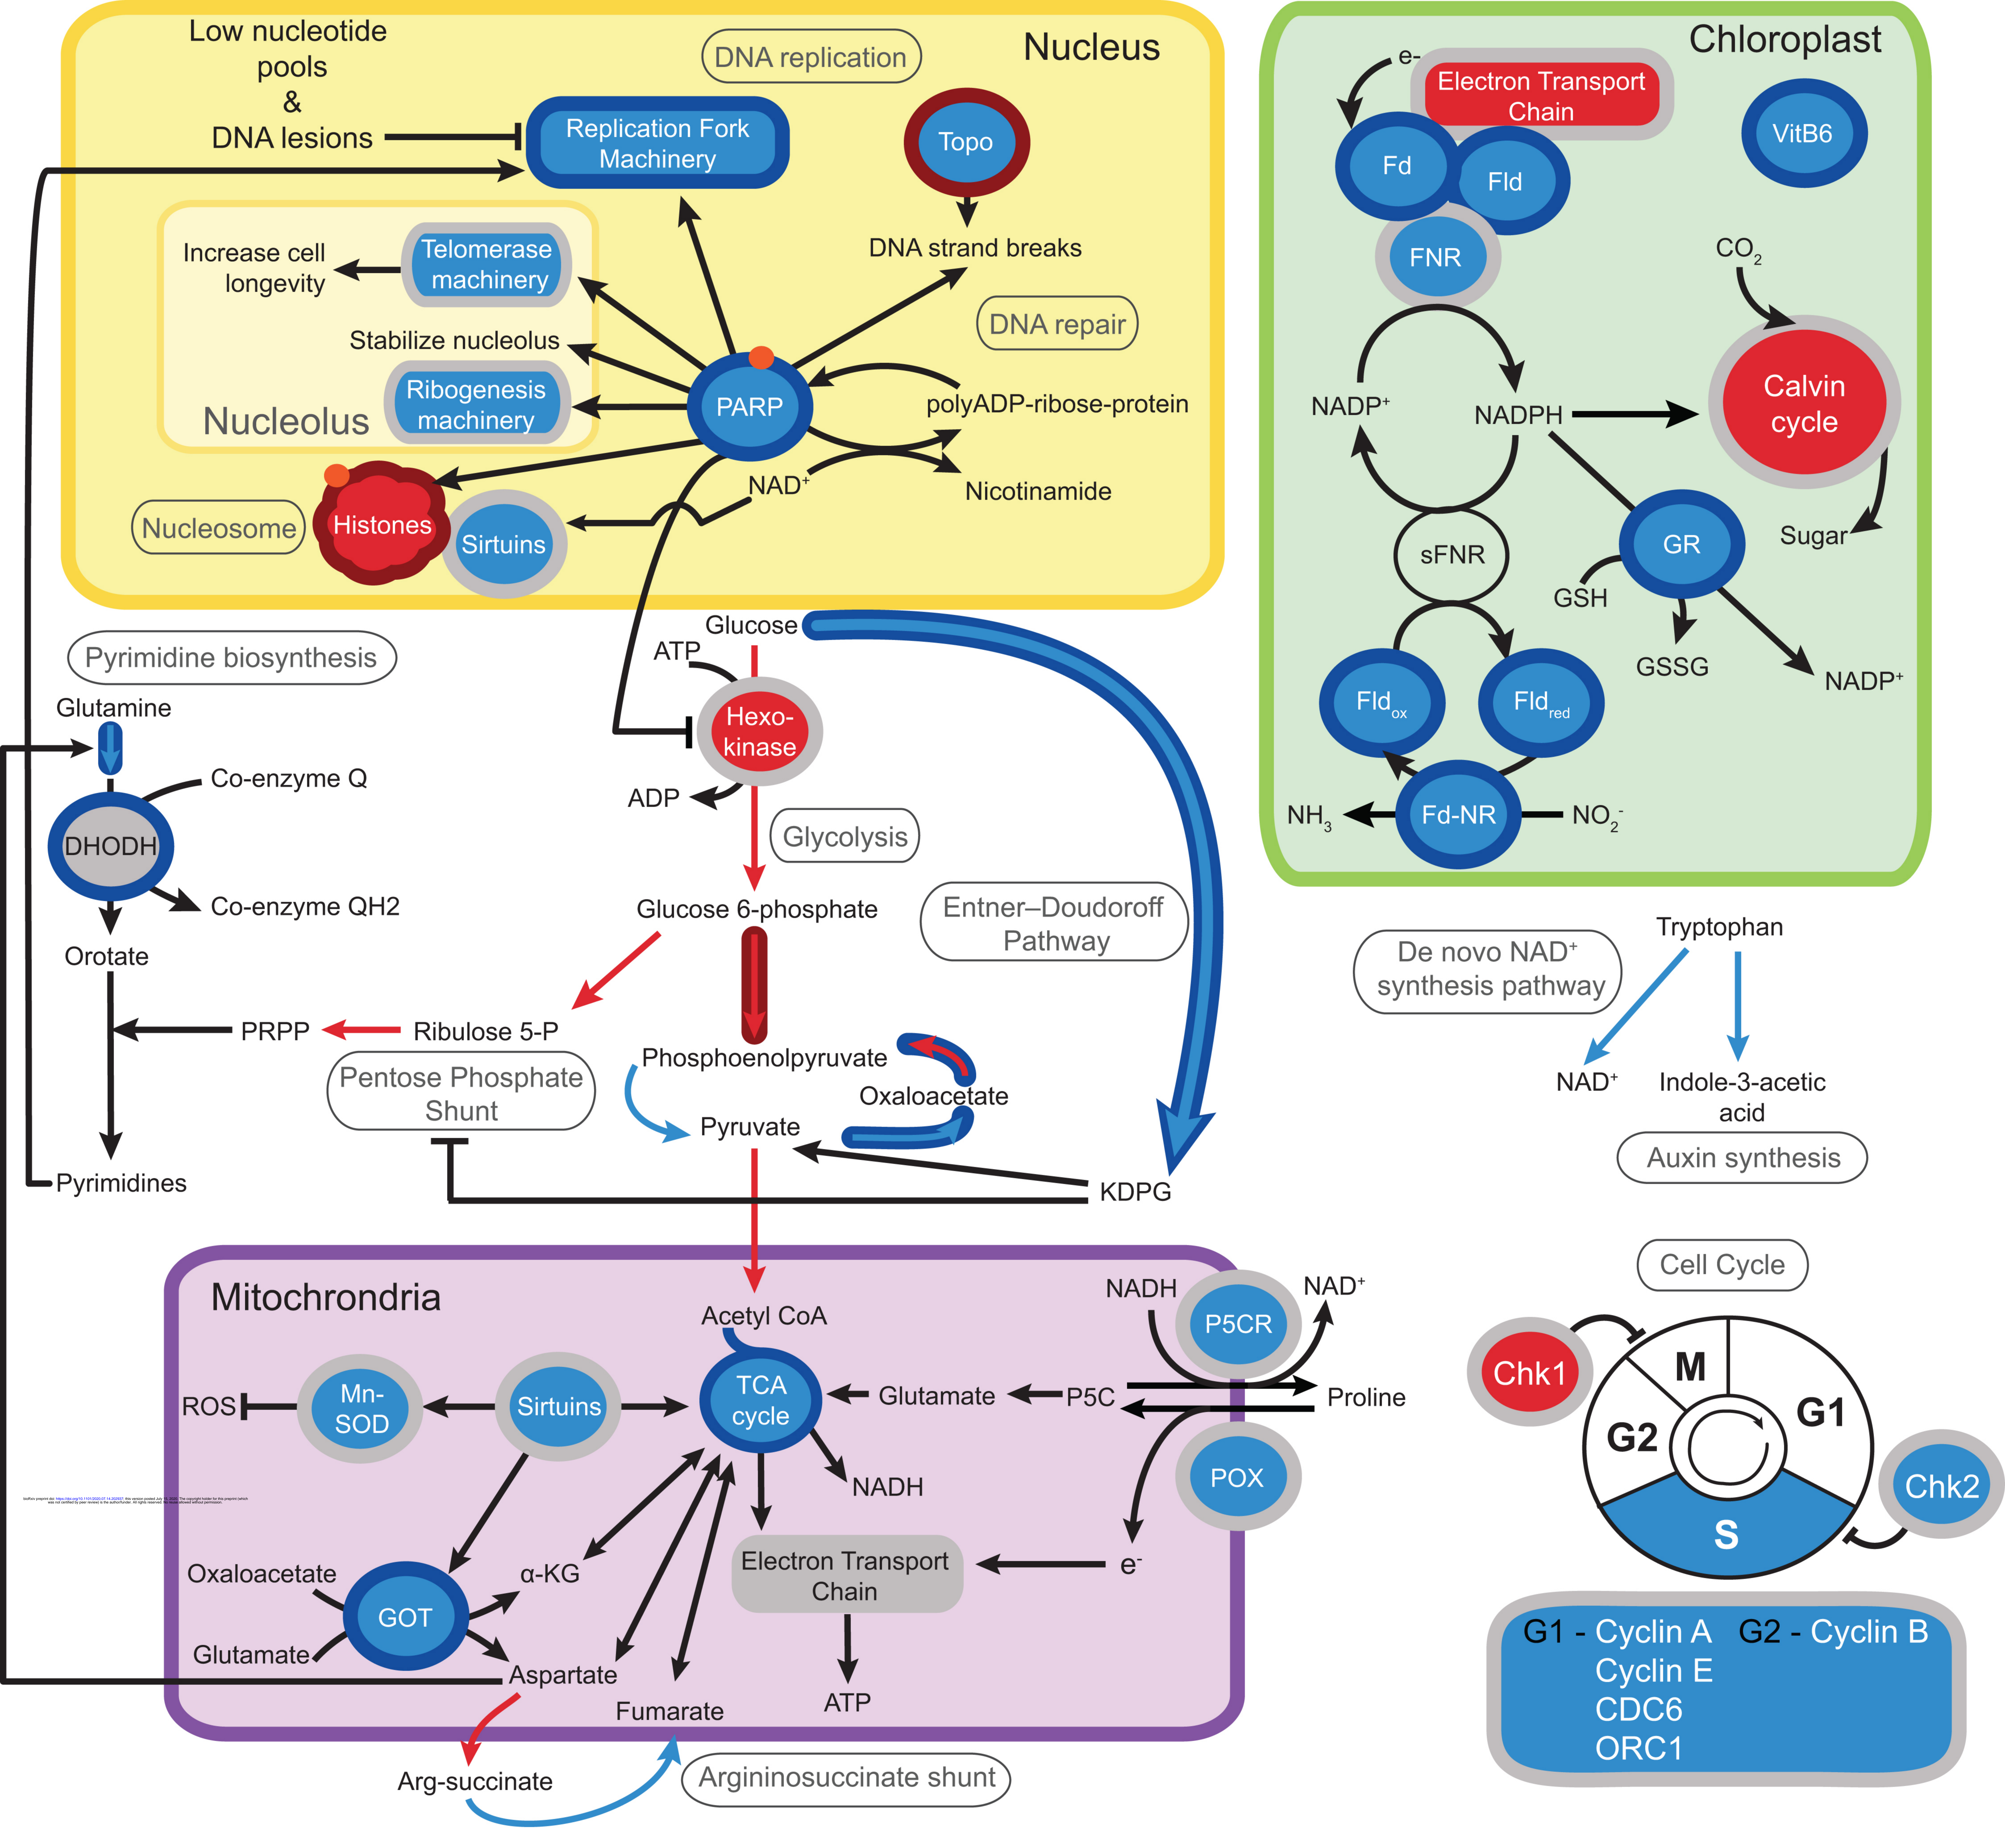



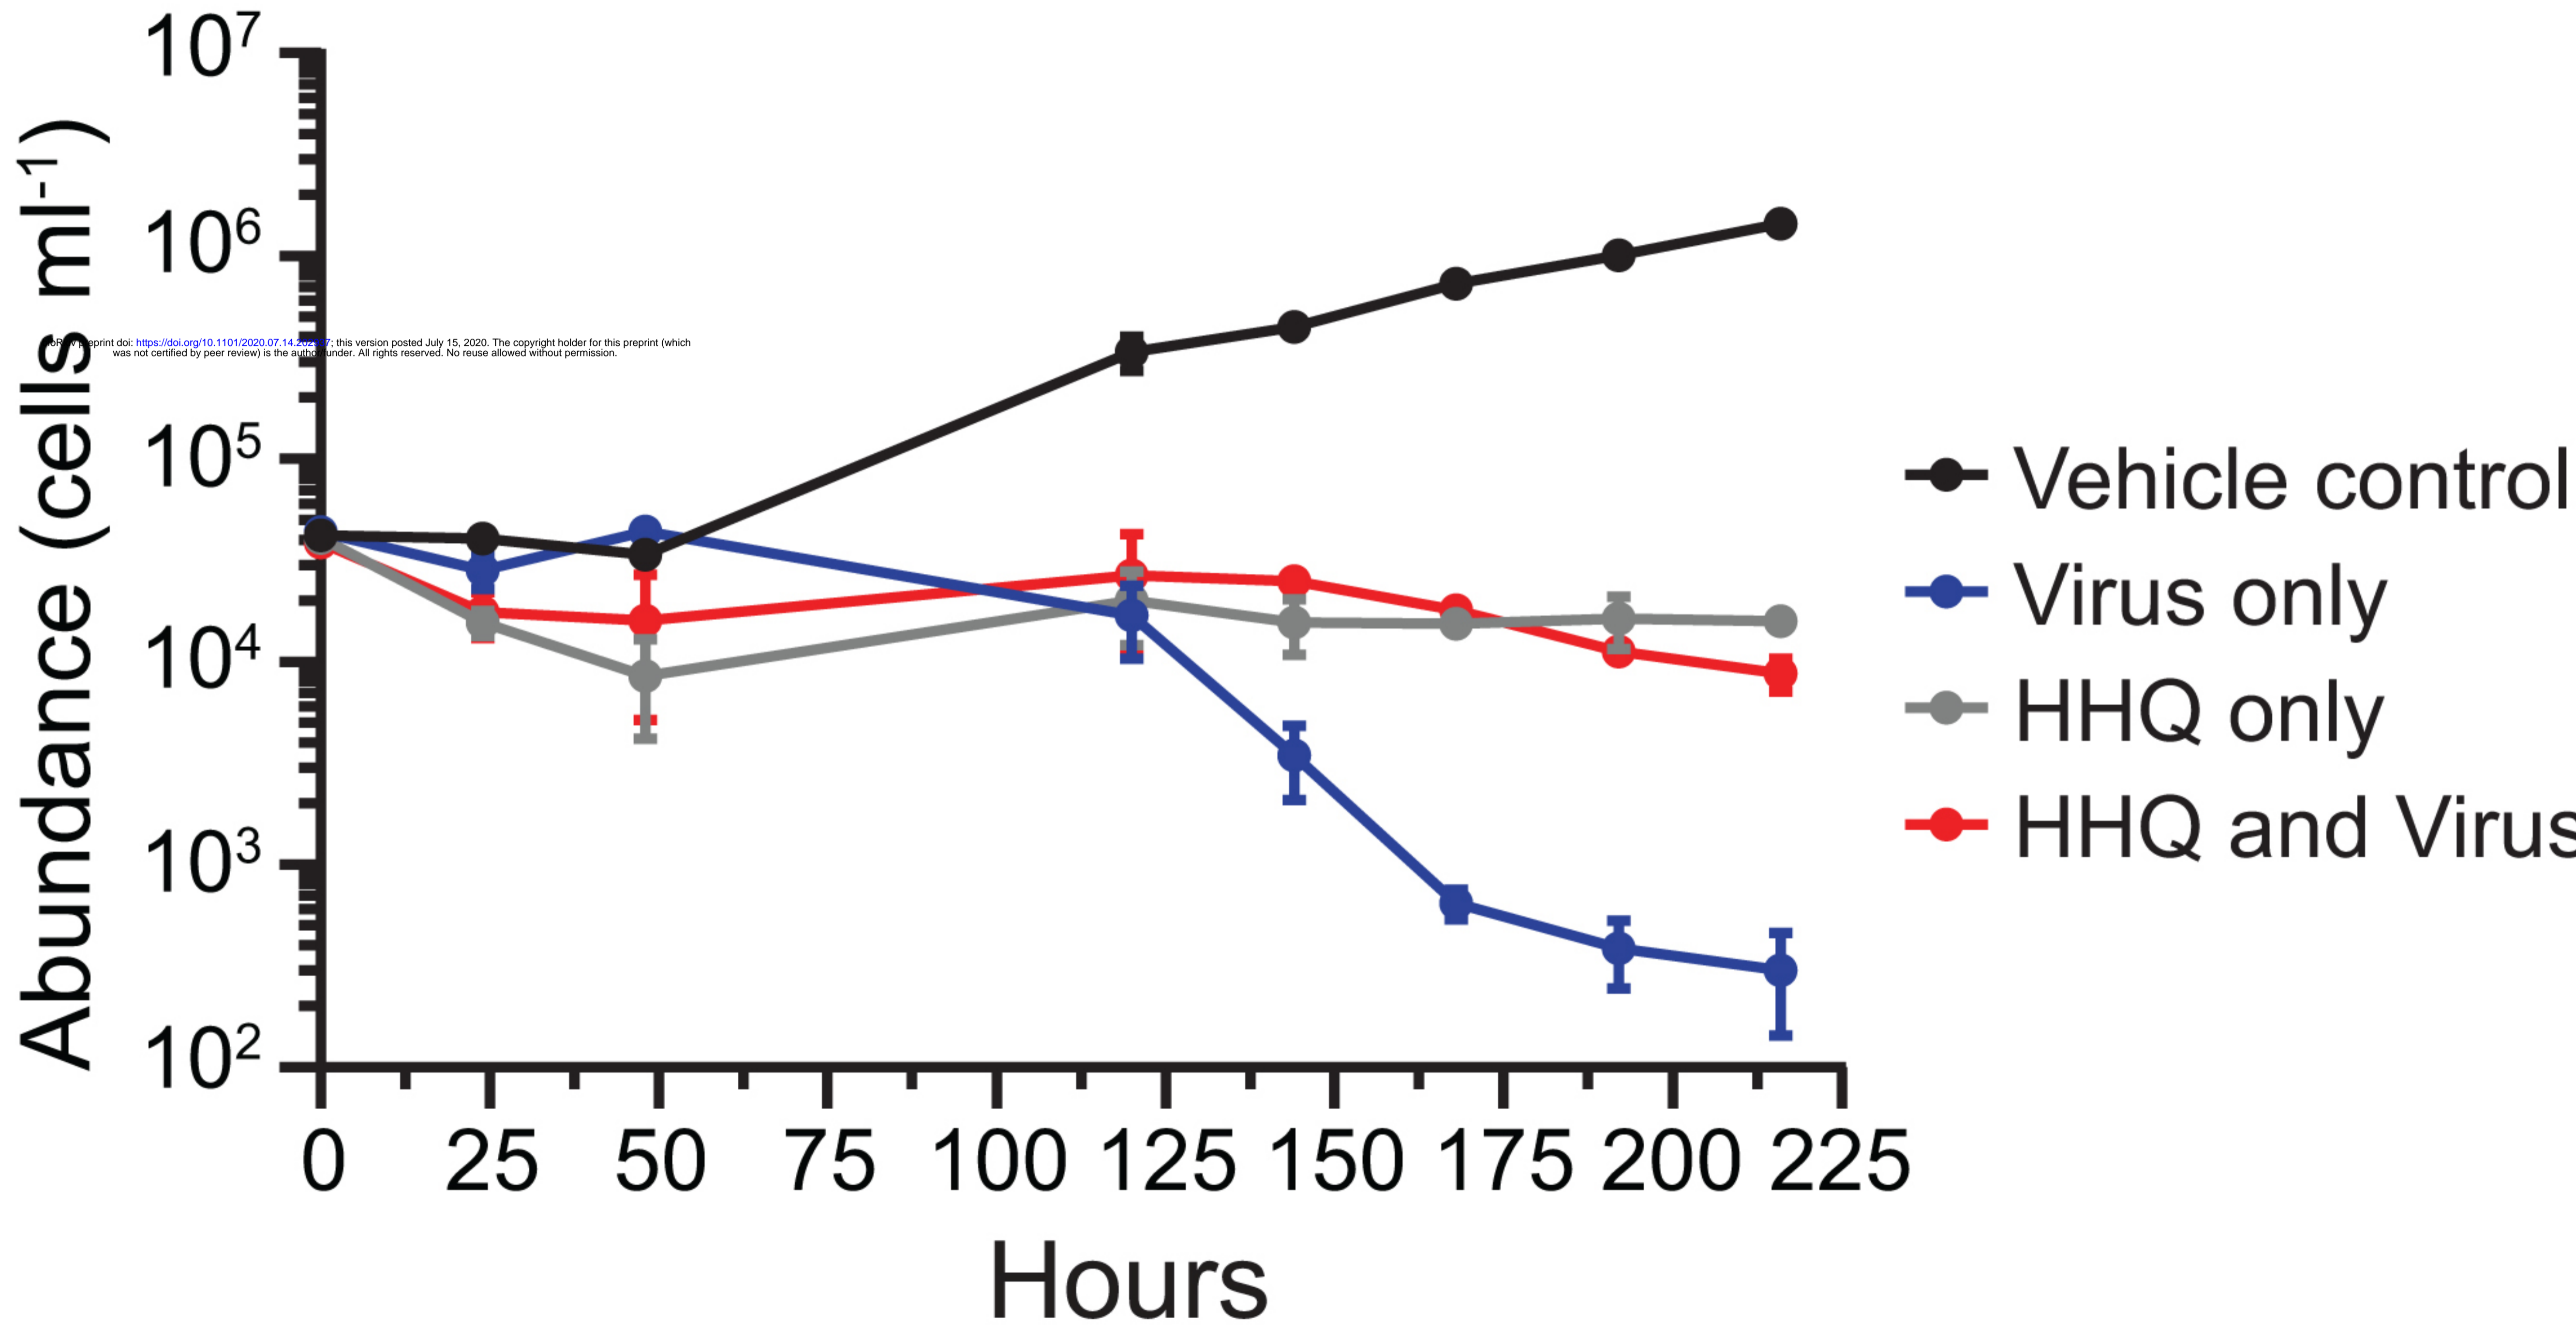

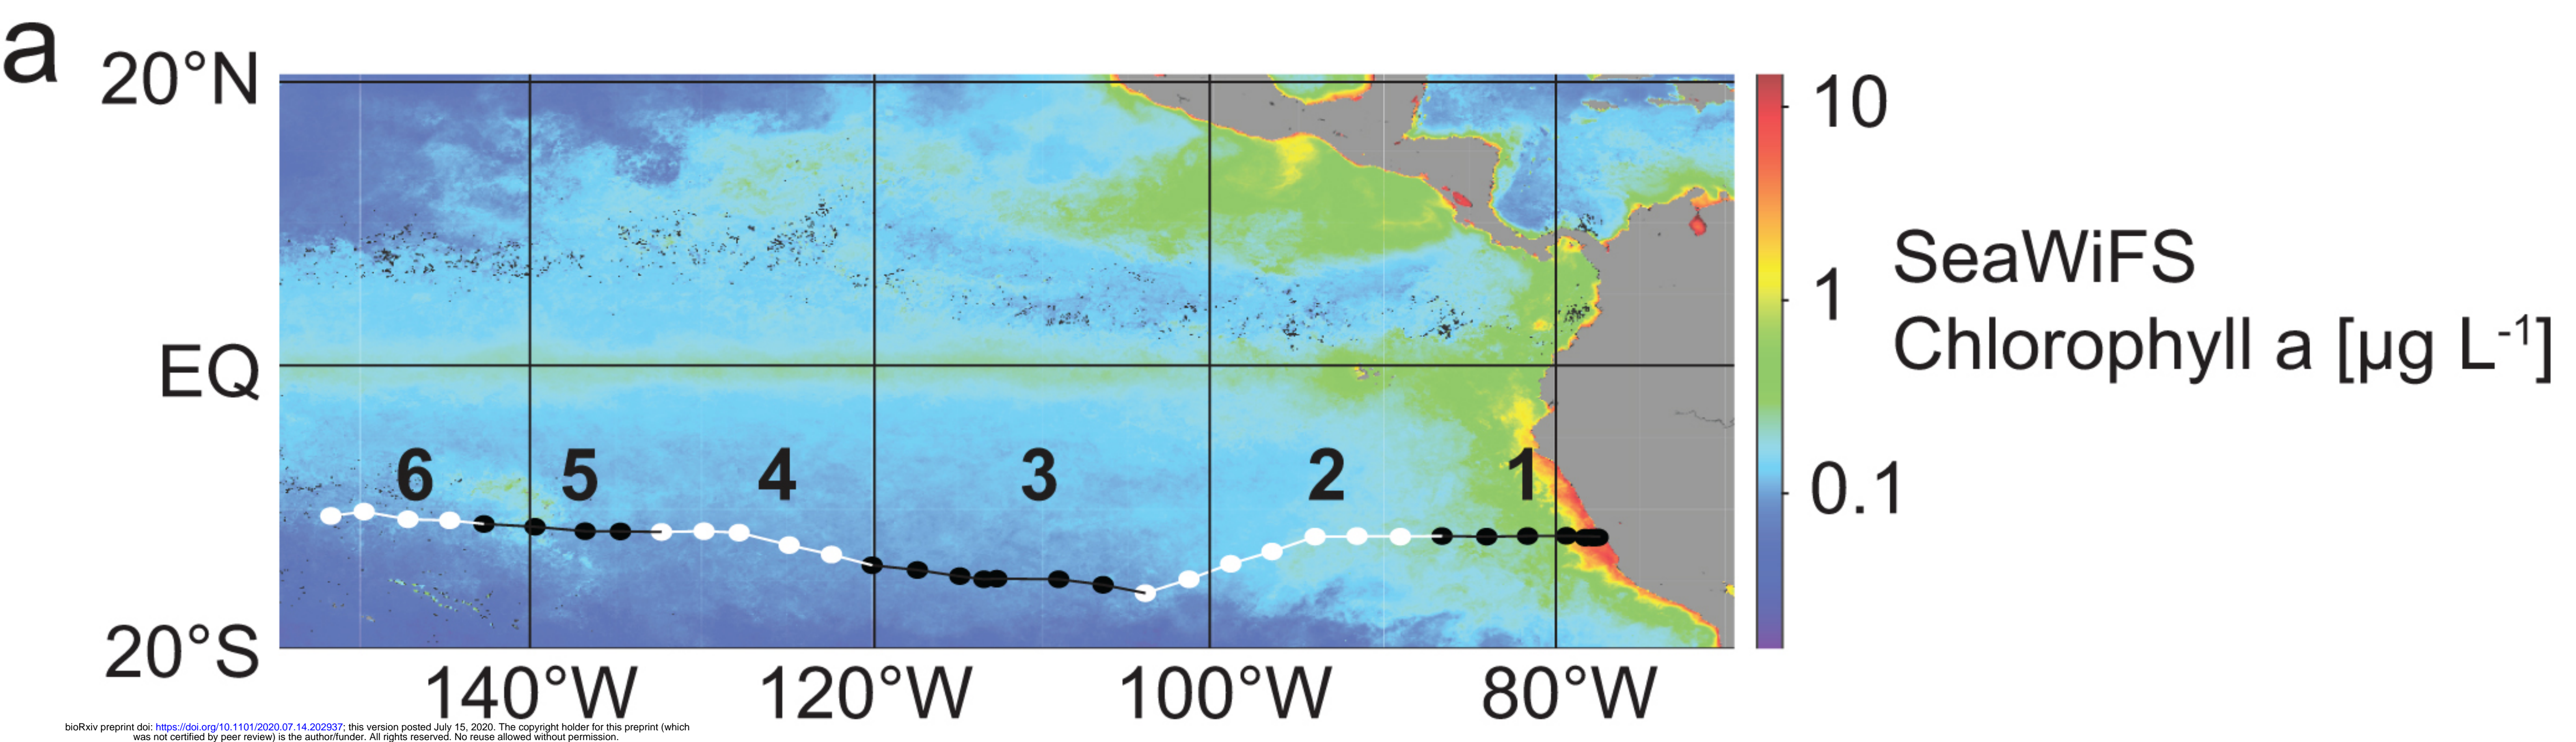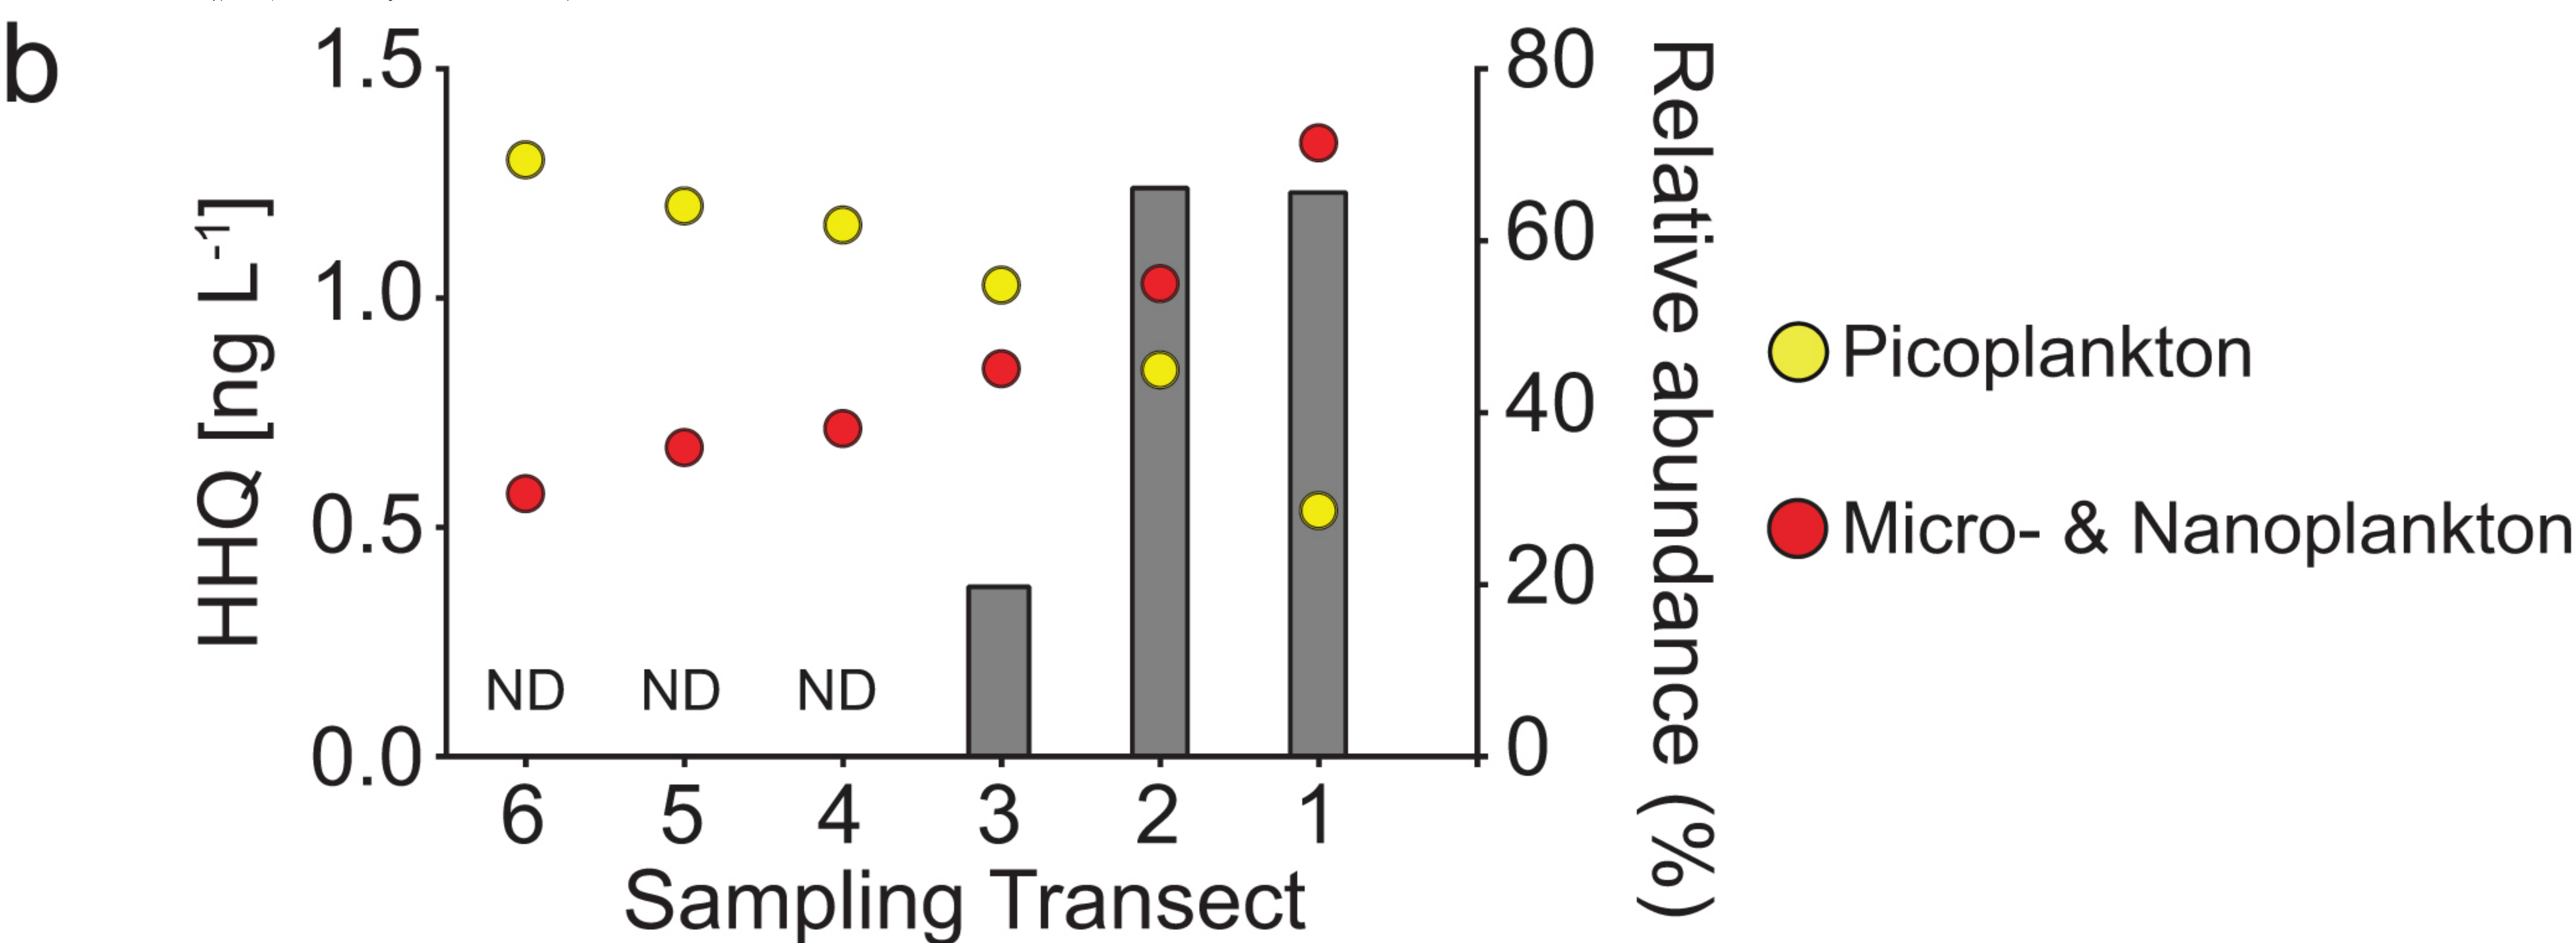

Source: https://www.biorxiv.org/content/10.1101/2020.07.14.202937v1.full.pdf
